1           **Integrating Biomedical Research and Electronic Health**  
2           **Records to Create Knowledge Based Biologically Meaningful**  
3           **Machine Readable Embeddings**

4  
5           **Charlotte A. Nelson<sup>1</sup>, Atul J. Butte<sup>2,3</sup>, Sergio E. Baranzini<sup>2,4\*</sup>**

6  
7           <sup>1</sup> Integrated Program in Quantitative Biology. University of California San Francisco.

8           <sup>2</sup> Bakar Computational Health Sciences Institute. University of California San Francisco.

9           <sup>3</sup> Department of Pediatrics. University of California San Francisco.

10          <sup>4</sup> Weill Institute for Neuroscience. Department of Neurology. University of California  
11          San Francisco.

12

13

14

15

16

17

18

19

20

21          \* Corresponding author: Sergio E. Baranzini  
22                                    e-mail: [Sergio.Baranzini@ucsf.edu](mailto:Sergio.Baranzini@ucsf.edu)  
23                                    Phone: 415-502-6865  
24                                    675 Nelson Rising Lane. San Francisco, CA. 94158. USA.

25 **ABSTRACT**

26

27 In order to advance precision medicine, detailed clinical features ought to be described in  
28 a way that leverages current knowledge. Although data collected from biomedical  
29 research is expanding at an almost exponential rate, our ability to transform that  
30 information into patient care has not kept at pace. A major barrier preventing this  
31 transformation is that multi-dimensional data collection and analysis is usually carried  
32 out without much understanding of the underlying knowledge structure. In an effort to  
33 bridge this gap, Electronic Health Records (EHRs) of individual patients were connected  
34 to a heterogeneous knowledge network called Scalable Precision Medicine Oriented  
35 Knowledge Engine (SPOKE). Then an unsupervised machine-learning algorithm was  
36 used to create Propagated SPOKE Entry Vectors (PSEVs) that encode the importance of  
37 each SPOKE node for any code in the EHRs. We argue that these results, alongside the  
38 natural integration of PSEVs into any EHR machine-learning platform, provide a key  
39 step toward precision medicine.

40

41

## 42 INTRODUCTION

43 The rate at which the ever growing body of world data is being transformed into  
44 information and knowledge in some areas (e.g. banking, e-commerce, etc.) far exceeds  
45 the pace of such process in the medical sciences. This problem is widely recognized as  
46 one of the limiting steps in realizing the paradigm of precision medicine, the application  
47 of all available knowledge to solve a medical problem in a single individual (National  
48 Research Council, 2011; Colijn et al. 2017).

49 In order to address this issue, several efforts to integrate these data sources in a  
50 single platform are ongoing (Sinha et al, 2015; Chen et al., 2016). The basic premise of  
51 data integration is the discovery of new knowledge by virtue of facilitating the navigation  
52 from one concept to another, particularly if they do not belong to the same scientific  
53 discipline. One of the most promising approaches to this end makes use of heterogeneous  
54 networks. Heterogeneous networks are ensembles of connected entities with multiple  
55 types of nodes and edges; this particular disposition enables the merging of data from  
56 multiple sources, thus creating a continuous graph. The complex nature and  
57 interconnectedness of human diseases illustrates the importance of such networks  
58 (Barabási et al., 2011). Even bipartite networks, with only two types of nodes, have  
59 furthered our understanding on disease-gene relationships, and provided insight into the  
60 pathophysiological relationship across multiple diseases (Goh et al., 2007).

61 In an attempt to address one of the most critical challenges in precision medicine,  
62 a handful of recent studies has started to merge basic science level data with phenotypic  
63 data encoded in electronic health records (EHRs) to get a deeper understanding of disease  
64 pathogenesis and their classification to enable rational and actionable medical decisions.  
65 One such project is the Electronic Medical Records and Genomics (eMERGE) Network.  
66 The eMERGE consortium collected both DNA and EHRs from patients at multiple sites.  
67 eMERGE and subsequent studies showed the advantages of using EHRs in genetic  
68 studies (Denny et al., 2010; Ritchie et al., 2010; Kho et al., 2011). Another project linked  
69 gene expression measurements and EHRs, an approach through which researchers were  
70 able to identify possible biomarkers for maturation and aging (Chen et al., 2008). While  
71 these studies illustrate the benefits of combining data from basic science with EHRs, no  
72 efforts connecting EHR to a comprehensive knowledge network have been yet reported.

73 This study builds upon these concepts and utilizes a heterogeneous network called  
74 Scalable Precision Medicine Oriented Knowledge Engine (SPOKE) to interpret data  
75 stored in electronic health records (EHR) of more than 800,000 individuals at UCSF.  
76 Currently, SPOKE integrates data from 29 publicly available databases and contains over  
77 47,000 nodes of 11 types and 2.25 million edges of 24 types, including disease-gene,  
78 drug-target, drug-disease, protein-protein, and drug-side effect (Himmelstein and  
79 Baranzini, 2015, Himmelstein et al, 2017).

80 In this work we describe a method for embedding clinical features from EHRs  
81 onto SPOKE. By connecting EHRs to SPOKE we are providing real-world context to the  
82 network thus enabling the creation of biologically and medically meaningful “barcodes”  
83 (i.e. embeddings) for each medical variable that maps onto SPOKE. We show that these  
84 barcodes can be used to recover purposely hidden network relationships such as *Disease-*  
85 *Gene*, *Disease-Disease*, *Compound-Gene*, and *Compound-Compound*. Furthermore, the  
86 correct inference of intentionally deleted edges connecting *SideEffect* to *Anatomy* nodes  
87 in SPOKE is also demonstrated.

88

89

## 90 **RESULTS**

91 The main strategy of this work is to embed EHRs onto the SPOKE knowledge network  
92 utilizing a modified version of PageRank, the well-established random walk algorithm  
93 (Page et al., 1999). These embeddings, called Propagated SPOKE Entry Vectors (PSEVs)  
94 encode the importance of each node in SPOKE for every overlapping concept between  
95 the EHRs and SPOKE.

96

### 97 **Embedding EHR concepts in a knowledge network**

98 Deidentified EHR data from 816,504 patients was obtained from the UCSF  
99 medical center through the Bakar Computational Health Sciences Institute (BCHSI). The  
100 cohort was then filtered to only include patients that had been diagnosed with at least one  
101 of the 137 complex diseases currently represented in SPOKE, leaving 292,753 patients  
102 for further analysis. Select structured data tables (including medication orders, lab tests,  
103 and diagnoses) were used to create the PSEVs (see Methods). Each structured EHR table  
104 contains codes that can be linked to standardized medical terminology allowing direct  
105 links to SPOKE, referred to as SPOKE Entry Points (SEPs). There are currently 3,527  
106 SEPs and although this represents a sizable proportion (7.5%) of all nodes in SPOKE,  
107 most nodes are not directly reachable, thus potentially diluting the power of the network's  
108 internal connectivity. Thus, a modified version of the random walk algorithm was used to  
109 propagate SEPs through the entirety of the knowledge network, thus creating a unique  
110 medical profile for each of the selected clinical features in the EHRs.

111 In the original random walk algorithm, a walker is placed onto a given node in a  
112 network, and it can move from one node to another as long as there is an edge connecting  
113 them. The algorithm was adjusted in a way similar to topic-sensitive PageRank  
114 (Haveliwala 2002), by weighing the re-start parameter of the random walker towards  
115 nodes that are important for a given patient population.

116 This modified version of PageRank can be applied to any patient cohort. To  
117 demonstrate that these vectors capture biologically meaningful information, PSEVs for  
118 Body Mass Index (BMI) (an ubiquitous variable in the EHR) were created. A patient's  
119 BMI is recorded at each visit and is equivalent to their weight (kg) over their height (m)  
120 squared. BMI is typically used to classify patients into 4 main categories (underweight,

121 normal, overweight, and obese). Decades of research have provided deep insight into  
122 both the phenotypic and mechanistic manifestation of obesity. However, only the top-  
123 level (phenotypic) information (i.e. BMI category) is captured in the EHRs. We  
124 hypothesized that by using this method it would be possible to integrate mechanistic and  
125 biological level data.

126 When examining the distribution of BMIs across the UCSF patient population  
127 four groups are clearly distinguishable. Though these four groups align well with the  
128 standard categories, patients were separated in unbiased manner using k-means clustering  
129 in order to keep the algorithm blind to these pre-assigned classes (Figure 1A). Therefore,  
130 patient cohorts can be created without a priori knowledge of the standard classes. Figure  
131 1B illustrates the modified PageRank algorithm using patients in the high BMI cohort  
132 (BMI > 34). First, the records from all 73,237 patients in the high BMI cohort were  
133 extracted. Second, connections were created between each of those patients and all of  
134 their additional SEPs. By definition, this means connections to any medication, diagnosis,  
135 or laboratory result that is present in both that patient's record and SPOKE. Third, a  
136 random walker is initialized and allowed to randomly jump back to the patient population  
137 with probability  $\beta$  (optimized  $\beta=0.1$ ). Each iteration results in a rank vector that reflects  
138 the proportion of time the walker spends on each node in the network. In practice, for  
139 each iteration, this is calculated by taking the dot product of the transition probability  
140 matrix and the rank vector from the previous iteration (See Methods). Once the difference  
141 between the previous and current rank vector is less than some threshold ( $\alpha=1E-3$ ),  
142 the final PSEV is returned (bottom vector).

143 One can imagine SPOKE as a set of interconnected water pipes and the SEPs as  
144 input valves. Then, the percentage of high BMI patients that have type 2 diabetes in their  
145 EHRs will determine how much water is allowed to flow through the type 2 diabetes SEP  
146 "valve". Once all of the valves have been calibrated to fit the high BMI patient  
147 population, water can then flow to downstream nodes in SPOKE. Once the water reaches  
148 an almost steady state, differential water flow will highlight intersections of pipes  
149 (SPOKE nodes) that are significant for high BMI patients.

150

151 **Identifying Phenotypic Traits in PSEVs**

152           The final PSEV is representative of how important each SPOKE node is for a  
153 given EHR concept based on both the connections in SPOKE and the patients with that  
154 concept in their EHR. To examine what this means, the prioritization of *Disease* elements  
155 in the PSEVs were compared for each of the four BMI cohorts. The top *Diseases* in the  
156 PSEV of the highest BMI cohort are obesity, hypertension, type 2 diabetes mellitus, and  
157 metabolic syndrome X. While not unexpected, the identification of these diseases as the  
158 most important conditions for this group of patients without any reference to the  
159 mechanisms underlying obesity present in the EHR, is noteworthy. These diseases are  
160 also well correlated with average BMI ( $r=0.75-0.95$ ) and when their rank is plotted  
161 against average BMI, have some of the steepest slopes (slope=5.4-6.7), suggesting they  
162 are causally related.

163           To learn more about the relationships between BMI and these diseases the plots of  
164 rank vs average BMI were further examined (Figure 2A). Hypertension becomes a top  
165 ranked *Disease* almost immediately (moving from rank 133 to 6 between BMI categories  
166 I and II). This makes sense given that hypertension is the most prevalent disease in UCSF  
167 cohort and many of the factors that contribute to hypertension risk are also related to  
168 increasing BMI. Metabolic syndrome X and obesity also display an abrupt rank change,  
169 on average 128 positions, between BMI categories II and III. This change suggests that  
170 metabolic syndrome X and obesity become associated with BMI once people have  
171 reached overweight status and that an increased BMI is one phenotypic manifestation of  
172 these conditions. Finally, type 2 diabetes mellitus becomes significantly ranked (position  
173 4) when patients reach overweight status. However, it differs in that progression in rank  
174 between BMI categories I and III is gradual suggesting increased BMI as a risk factor in  
175 type 2 diabetes mellitus. In contrast, celiac and Crohn's disease progressively move down  
176 114 and 120 positions respectively between BMI categories I and IV. This trend could be  
177 explained by the fact that weight loss is symptomatic of both celiac and Crohn's disease.  
178 Another *Disease* that shows a progressively moves down in rank with increased BMI is  
179 attention deficit hyperactivity disorder (ADHD). This negative correlation is due to the  
180 fact that most of the medications used to treat ADHD have side effects related to weight  
181 loss and loss of appetite. These results show that the algorithm correctly up-weights

182 phenotypes associated with high BMI in the PSEVs for Cohorts III and IV while also  
183 down-weighting those phenotypes in the low BMI Cohorts.

184 It should be noted that up until this point, BMI has been treated as a continuous  
185 variable used to simply split patients into groups and the algorithm has been blind to the  
186 standardized classes associated to those groups. BMI was chosen to illustrate the utility of  
187 PSEVs because the consequences/traits of an abnormal BMI are very well known.  
188 However, since a PSEV can be created for any variable in the EHRs they can also be  
189 used to reveal phenotypic traits associated with less well-understood variables and  
190 phenotypes.

191

### 192 **PSEVs can Learn Genotypic Traits and Underlying Biological Mechanisms**

193 To test whether the same trend was seen at genotypic level, linear regressions  
194 were computed on the average BMI vs *Gene* rank. Again, the genes that positively  
195 correlated with average BMI were given the top prioritization in the high BMI PSEV. An  
196 example of a gene that is positively correlated with BMI is Alpha-Ketoglutarate  
197 Dependent Dioxygenase (FTO), also known as Fat Mass And Obesity-Associated  
198 Protein, is shown in Figure 2B. To check if these genes were genetically related to BMI,  
199 genes associated with increased BMI (not necessarily obesity, just an average increase)  
200 were extracted from the GWAS catalog (n=365) and compared them to the top 365  
201 ranked Genes in the PSEVs. Remarkably, BMI category IV was significantly enriched in  
202 known BMI associated genes (p=2.19E-10; Figure 2C). BMI category III was also  
203 significant while the BMI cohorts corresponding to underweight and normal BMIs  
204 showed no significant enrichment. Additionally, it was hypothesized that genes with  
205 altered expression would also be highly ranked. We found that 34% of dysregulated  
206 genes resided in the top 0.6% (n=119) of genes in the PSEV for cohort IV (p=9.28E-72;  
207 Figure 2D). This immense enrichment occurred because, unlike the GWAS catalog,  
208 datasets in the Gene Expression Omnibus (GEO) with just BMI as a phenotype (without  
209 any other major disease), had already been incorporated into SPOKE via obesity *Disease-*  
210 *UP(DOWN)REGULATES-Gene*. Together these results illustrate that PSEVs can learn  
211 new relationships (GWAS) while also maintaining the known relationships in SPOKE  
212 (GEO).



213

## 214 **PSEVs Preserve Original SPOKE Edges**

215       After identifying that the high BMI PSEV was able to preserve the known gene  
216 expression edges in SPOKE, we decided to check this in a high throughput manner. To  
217 do this, PSEVs were created for all of the concepts in the EHRs that directly mapped to a  
218 node in SPOKE (SEPs; n=3,233). Then the top ranked nodes (ranked per type) in each  
219 PSEV were examined (Supplementary Figure 1A-C). The majority of top ranked nodes in  
220 a given PSEV are also first neighbor relationships in SPOKE. For example, the Multiple  
221 Sclerosis (MS) *Disease* node is connected to 39 *Anatomy* nodes in SPOKE, if the top 39  
222 ranked *Anatomy* nodes are selected from the MS PSEV there is a 100% overlap with the  
223 MS *Anatomy* neighbors. Similarly, for *Symptom* nodes connected to MS, 80% of first  
224 neighbor relationships are maintained. This means that although most of the top nodes are  
225 the same, new relationships are prioritized based on the symptoms experienced by  
226 individual MS patients at UCSF. Next, the prioritizations of nodes that are not directly  
227 connected in SPOKE were considered (Supplementary Figure 1C). For instance, multiple  
228 nodes related to the *response to interleukin-7* are ranked among the top 10  
229 *BiologicalProcess* nodes and the node for the *structural constituent of myelin sheath* in  
230 the top 10 *MolecularFunction* nodes. Though there is an abundance of evidence  
231 supporting these relationships, there is no direct relationship in SPOKE nor is this  
232 information stored in the EHRs, thus they must be learned during PSEV creation. These  
233 results illustrate the ability of PSEVs to preserve the original information from SPOKE  
234 while expanding its significance in a biologically meaningful manner by reaching out to  
235 more distant but biologically related nodes. Further, this demonstrates that PSEVs  
236 describe each EHR concept in multiple dimensions and is true to the hierarchical  
237 organization of complex organisms.

238

239       After identifying and implementing a method to embed EHR onto the knowledge  
240 network, we sought to verify in a rigorous manner that the obtained vectors are  
241 biologically meaningful (i.e. that the expanded set of variables stemming from EHRs  
242 result in a network of related medical concepts). Next, we demonstrate that the PSEV  
243 ability to learn genetic relationships can be applied in a high throughput fashion.

244 Additionally, a series of benchmarks (supplemental text) shows that PSEVs ability to  
245 learn connections can be applied to other edge types such as *Disease-Disease* and  
246 *Compound-Compound* similarity, *Compound* to drug-protein (molecular targets), and  
247 *SideEffect-Anatomy*.

248

### 249 **Uncovering specific *Disease-Gene* Relationships in EHR embeddings.**

250 Because of the multitude of concepts present in SPOKE, multiple paths can  
251 connect any two nodes, thus providing redundancy. Thus, we hypothesized that unknown  
252 relationships, like the GWAS genes recovered in the high BMI PSEV, could still be  
253 inferred even if some of the information was missing because the random walker would  
254 traverse similar paths during PSEV computation. To address this point, all of the  
255 *Disease-Disease* and *Disease-Gene* edges in SPOKE were removed and the PSEVs were  
256 recomputed the *Disease* PSEVs ( $PSEV^{\Delta DD, \Delta DG}$ ), ranking the *Gene* nodes in each *Disease*  
257 PSEV.

258 The resulting PSEVs ( $PSEV^{\Delta DD, \Delta DG}$ ) were visualized in a heatmap and clustered  
259 by *Diseases* and *Genes* (Fig 3A). Clearly defined groups of diseases can be identified in  
260 the heatmap, many of which are known to share associated or influential genes. For  
261 example, Disease Cluster 4 contains mainly neurological, diseases such as multiple  
262 sclerosis, Alzheimer's disease, narcolepsy, autistic disorder, and attention deficit  
263 hyperactivity disorder. The Gene cluster most characteristic of Disease Cluster 4 contains  
264 197 genes (Fig 3B). Within this Gene cluster, 96 *Genes* are associated with at least one  
265 *Disease* in Disease Cluster 4 (enrichment fold change=2.0), 33 *Genes* are associated with  
266 at least 2 diseases (enrichment fold change=3.9), and 15 *Genes* are associated with at  
267 least 3 diseases (enrichment fold change=5.4; Fig 3C-D). These results support the  
268 hypothesis that PSEVs encode deep biological meaning.

269 To validate that the recomputed PSEVs (generated without the critical edges)  
270 were able to uncover genetic relationships among the complex diseases in SPOKE, a  
271 *Disease-Gene* networks (DG) using the top K *Gene* nodes for each *Disease* in  $PSEV^{\Delta DD, \Delta DG}$   
272  $\Delta DG$  was created, where K is equal to the number of known gene associations for a given  
273 disease. In SPOKE, the ASSOCIATES\_DaG edges represent known associations  
274 between *Diseases* and *Genes* and are obtained from the GWAS Catalog (MacArthur et

275 al., 2017), DISEASES (Pletscher-Frankild et al., 2015), DisGeNET (Pin˜ero et al., 2015;  
276 Pin˜ero et al., 2016), and DOAF (Xu et al., 2012). DG networks were generated using  
277 either the original PSEVs ( $DG^{PSEV}$ , Blue) or the incomplete, benchmarking  $PSEV^{\Delta DD, \Delta DG}$   
278 ( $DG^{PSEV^{\Delta DD, \Delta DG}}$ , Green Fig. 4A). These networks were compared against networks  
279 created using three random matrices as a way to generate a null distribution:  
280  $PSEV^{RANDOM}$  ( $DG^{RANDOM}$ , Pink distribution Fig. 4A),  $PSEV^{SPOKE SHUFFLED}$  ( $DG^{SPOKE}$   
281  $SHUFFLE$ , Red), and  $PSEV^{SEP SHUFFLED}$  (Orange,  $DG^{SEP SHUFFLE}$ ). Next, the number of  
282 overlapping edges between each of the DG networks and the gold standard *Disease-*  
283 *ASSOCIATES\_DaG-Gene* ( $DG^{SPOKE}$ ) edges (n=12,623) in SPOKE were compared.  
284 When selecting the top K *Genes* using only *Genes* with at least one *ASSOCIATES\_DaG*  
285 edge (n=5,392), both  $DG^{PSEV}$  and  $DG^{PSEV^{\Delta DD, \Delta DG}}$  shared significantly more edges with  
286  $DG^{SPOKE}$  than with any of the random networks (Fig 4A; average fold change 15.2 and  
287 2.4 accordingly). This suggests that redundancy in spoke paths can be used to infer  
288 genetic relationships even when the original (direct) associations are removed.

289 These results were even more striking when selecting the top K genes using all  
290 genes in SPOKE (Fig 4A insert; n=20,945; average fold change 40.6 and 4.5  
291 accordingly). It should also be noted that, unlike  $PSEV^{\Delta DD, \Delta DG}$ , both  $PSEV^{SEP SHUFFLED}$   
292 and  $PSEV^{SPOKE SHUFFLED}$  were created without deleting the *Disease-Disease* and *Disease-*  
293 *Gene* edges from SPOKE, therefore the correct edges were present at least some of the  
294 time even in the permuted networks, thus providing a higher level of stringency.

295

## 296 **Learning Rate Differs Between Edge Types**

297 One of the main challenges with knowledge networks is that as long as our  
298 knowledge is incomplete, the networks will suffer from missing edges. The benchmark  
299 shown here illustrates the most severe scenario in which 100% of our knowledge about  
300 the relationships among *Diseases* and between *Diseases* and *Genes* is removed. To  
301 evaluate performance of the algorithm as the network gains knowledge, edges were  
302 slowly added back to the network. We found that the PSEVs learned well-established  
303 (ASSOCIATES) *Disease-Gene* edges before the more noisy (REGULATES) edges  
304 (Figure 4B). This is most likely due to the fact that well-established (associated) *Genes*  
305 are necessarily drivers of (not reacting to) a *Disease*. In practice this would cause the

306 random walker keep going back to *BiologicalProcess*, *CellularComponent*,  
307 *MolecularFunction*, and *Pathway* nodes that are important for a given *Disease* and  
308 thereby push information to *Genes* involved in those activities. Alternatively, the random  
309 walker could travel to *Anatomy* nodes that express *Genes* that are associated with a  
310 *Disease* or through *Compounds* that are used to treat (or even those that exacerbate) a  
311 *Disease*. This further demonstrates that the relationships inferred within PSEVs are  
312 biologically meaningful.

313

### 314 **Retracing the path between SEP and Genes**

315 Finally, to understand how the patient population at UCSF influenced the PSEVs  
316 to correctly rank *Disease-Gene* associations the shortest paths were retraced between the  
317 significant SPOKE Entry points of a given *Disease* and the associated *Gene* (Fig 4C;  
318 Methods). For example, the locus containing *CSMD1* is associated with Schizophrenia in  
319 the GWAS Catalog. Figure 4D shows why the gene *CSMD1* was one of the top ranked  
320 Genes in the  $PSEV^{\Delta DD, \Delta DG}$  for Schizophrenia. The weight from the EHRs of  
321 Schizophrenia patients at UCSF drives information towards *Anatomy* in which *CSMD1* is  
322 expressed or regulated and *Compounds* that bind or regulate *Genes* that interact or  
323 regulate with *CSMD1*. The combined weight highlights *CSMD1* as a gene that is  
324 associated with Schizophrenia. This example highlights the fact that inferences made  
325 with this method are not “black box” predictions, but the information used to make the  
326 inference can be traced back to the exact concepts. We believe that knowledge based  
327 “clear box” algorithms, such as the one presented here, will be pivotal in the  
328 advancement of precision medicine.

329

330

331

332

## 333 DISCUSSION

334 Uncovering how different biomedical entities are related to each other is essential  
335 for speeding up the transformation between basic research and patient care. When  
336 deciding the best therapeutic management strategy for a patient, physicians often need to  
337 think about the symptoms they present, their internal biochemistry, and potential  
338 molecular impact and adverse events of drugs simultaneously. A well-trained and  
339 experienced doctor will likely prescribe the best course of action for that patient.  
340 However, significant heterogeneity is seen even across the best hospitals on what “best  
341 course of action” means for a given patient, resulting in poor consistency, a labyrinth of  
342 solutions, and ultimately lack of evidence-based medicine. Since it is naturally  
343 impossible for a single person to retain and recall all the necessary and relevant  
344 information, an efficient manner to incorporate this knowledge into the health care  
345 system is needed. We argue that since PSEVs can be created for any code or concept in  
346 the EHRs it is possible they could provide such solution. Using PSEVs we were able to  
347 integrate what we have learned from the last five decades of biomedical research into the  
348 codes used to describe patients in the EHRs. As a result, these embeddings serve as a first  
349 step to bridging the divide between basic science and patient data.

350 Our method for the integration of EHRs and a comprehensive biomedical  
351 knowledge network is based on random walk. Random walk has been applied to a wide  
352 variety of biological topics such as protein-protein interaction networks (Can et al.,  
353 2005), gene enrichment analysis (Subramanian et al., 2005), and ranking disease genes  
354 (Köhler et al., 2008; Valentini et al., 2014; Wang et al., 2015). Additionally, random walk  
355 has been used to infer missing relationships in large incomplete knowledge bases (Lao et  
356 al., 2011). Our method includes the generation of PSEVs, as a way to embed medical  
357 concepts onto the network. The entire patient population at UCSF was used to determine  
358 how important each node in SPOKE is for a particular code. Therefore, each PSEV  
359 describes EHR codes in both a high level phenotypic and deeper biological manner.

360 We demonstrate that not only do PSEVs carry the original relationships in  
361 SPOKE, but also are able to infer new connections. This was illustrated by ability of  
362 PSEVs to recover deleted *Disease-Disease*, *Disease-Gene*, *Compound-Compound*, and  
363 *Compound-Gene* edges as well as to infer new relationships between *SideEffect* and

364 *Anatomy* nodes. Other than just showing that PSEVs can learn relationships between  
365 different types of nodes, these tests illustrated that PSEVs can learn relationships between  
366 nodes at a variety of lengths apart from one another. By inferring the *Disease-Disease*  
367 and *Compound-Compound* edges, we demonstrated that PSEVs could find SEP-, or  
368 EHR-level relationships. By inferring *Disease-Gene* and *Compound-Gene* edges, we  
369 verified that PSEVs could find SEP to SPOKE level relationships. Finally, by inferring  
370 *SideEffect-Anatomy* edges we proved PSEVs could find SPOKE-level relationships.  
371 These tests served as our proof of principle that PSEVs can learn multiple types of new  
372 relationships.

373 Further, these results illustrate that, unlike black box methods, PSEVs are capable  
374 of embedding phenotypic traits such as risks, co-morbidities, and symptoms. Other  
375 vectorization methods like word2vec are able to learn relationships, however since the  
376 elements within the vector are unknown they cannot be traced back to a given trait in the  
377 EHRs. Similarly, though it is possible to identify these phenotypic traits using a statistical  
378 analysis of a single cohort, the benefit to using PSEVs is that these traits are identified in  
379 a high throughput fashion for every concept in the EHRs and outputs them in a format  
380 that can be used in machine learning platforms. PSEVs, and other clear box algorithms,  
381 allow us to integrate knowledge into data, therefore generating deeper, informed  
382 characterizations that can be understood by both humans and machines.

383 The potential uses of PSEVs are vast. We recognize that several associations in  
384 EHRs can be uncovered using clinical features alone, and several machine-learning  
385 approaches are already being utilized to that end (Shickel et al., 2018). However, since  
386 PSEVs describe clinical features on a deeper biological level, they can be used to explain  
387 why the association is occurring in terms of Genes, Pathways, or any other nodes in a  
388 large knowledge network like SPOKE. Consequently, PSEVs can be paired with machine  
389 learning to discover new disease biomarkers, characterize patients, and drug repurposing.  
390 With implementation of some of these features, we anticipate that PSEVs or similar  
391 methods will constitute a critical tool in advancing precision medicine.

392  
393  
394

395

396

397

## 398 **MATERIALS AND METHODS**

399

### 400 **Electronic Health Records**

401 The University of California, San Francisco (UCSF) supplied the Electronic  
402 Health Records (EHRs) in this paper through the Bakar Computational Health Sciences  
403 Institute. Almost one million people visited UCSF between 2011-2017. Out of 878,479  
404 patients 292,753 had at least one of the 137 complex diseases currently represented in  
405 SPOKE. The EHRs were de-identified to protect patients' privacy. For this paper we  
406 collected the information on the cohort of patients with complex diseases using de-  
407 identified LAB, MEDICATION\_ORDERS, and DIAGNOSES tables. The LAB table  
408 contains the lab test orders and results, including the actual measurements and the  
409 judgment of whether the results were abnormal. The MEDICATION\_ORDERS table  
410 contains prescriptions with dose, duration, and unit. The DIAGNOSES table contains  
411 diagnosis and symptoms with ICD9 and ICD10 codes. These tables are linked by Patient  
412 IDs (one unique ID for each patient) and Encounter IDs (one unique ID for each  
413 encounter a given patient has with our medical system).

414

### 415 **Scalable Precision Medicine Oriented Knowledge Engine**

416 Scalable PrecisiOn Medicine Knowledge Engine (SPOKE) is a heterogeneous  
417 knowledge network that includes data from 29 publicly available databases, representing  
418 a significant proportion of information gathered over five decades of biomedical research  
419 (Himmelstein et al. 2017). This paper was powered by the first version of SPOKE, which  
420 contains over 47,000 nodes of 11 types and 2.25 million edges of 24 types. The nodes  
421 (Anatomy, BiologicalProcess, CellularComponent, Compound, Disease, Gene,  
422 PharamacologicalClass, SideEffect, and Symptom) all use standardized terminologies  
423 and were derived from five different ontologies. The sources and counts of each node and  
424 edge type are detailed in Supplementary Tables 1A,B.

425

### 426 **Connecting EHRs To SPOKE**

427 EHRs were connected to SPOKE *Disease*, *Symptom*, *SideEffect*, *Compound*, and  
428 *Gene* nodes. To connect to *Disease* nodes, ICD9/10 (Steindel 2010) codes in the EHRs



429 were translated to *Disease* Ontology identifiers (Schriml et al., 2012; Kibbe et al., 2015).  
430 Since this relationship was used to select the patient cohort, we manually curated the  
431 mappings. The connection to *Symptom* and *SideEffect* nodes was also made from  
432 translating the ICD9/10 codes via MeSH identifiers and CUI respectively. The  
433 relationship between *Compound* nodes and EHRs was derived by mapping RxNorm to  
434 the FDA-SRS UNII (Unique Ingredient Identifiers) to DrugBank Identifiers. Lab tests  
435 were connected to multiple node types in SPOKE using the Unified Medical Language  
436 System (UMLS) Metathesaurus (Bodenreider, 2004). The LOINC (McDonald et al.,  
437 2003) codes in the EHRs were mapped to CUI and then mapped to a second CUI (CUI2)  
438 using UMLS relationships. A connection between LOINC and SPOKE would be made if  
439 CUI2 could be translated to a node in SPOKE. CUIs with nonspecific relationships were  
440 excluded. There are 70,843 unique codes found in the Diagnosis, Medication Orders, and  
441 Labs tables in the UCSF EHRs, 70,842 of which mapped to 3,527 nodes in SPOKE. Of  
442 these, 3,233 were seen in the complex disease cohort and were used as the SPOKE Entry  
443 Points (SEPs).

444

#### 445 **Generating Propagated SPOKE Entry Vectors**

446 First, we initialized a  $n \times n$  SEP transition matrix (where  $n$  = the number of SEPs)  
447 and set every value to zero. Then for each patient in the complex disease cohort, we  
448 created a binary vector of the SEPs in their EHRs and divided it by the sum of the vector.  
449 This patient vector was then added to the rows of the SEP transition matrix that  
450 corresponded to the SEPs found in the patient's EHRs. Once every patient was accounted  
451 for, the SEP transition matrix was transposed and divided by the sum of the columns.

452 Next, we made an adjacency matrix using the edges in SPOKE to create a SPOKE  
453 transition probability matrix (TPM) in which each column sums to 1. The SPOKE TPM  
454 was then multiplied by  $1-\beta$  where  $\beta$  equals the probability of random jump. An extra row  
455 was then added to the SPOKE TPM and filled with  $\beta$ .

456 Last, the Propagated SPOKE Entry Vectors (PSEVs) were generated using a  
457 modified version of the PageRank algorithm (Page et al., 1999; Haveliwala 2002). In this  
458 version of PageRank, for each PSEV, the random walker traverses the edges of SPOKE  
459 until randomly jumping out of SPOKE (at probability  $\beta$ ) to the given SEP. The walker

460 will then enter back into SPOKE through any SEP using the probabilities found in the  
461 corresponding column of the SEP transition matrix. The walker will continue this cycle  
462 until the difference between the rank vector in the current cycle and the previous cycle is  
463 less than or equal to a threshold ( $\alpha$ ). The final rank vector is the PSEV and contains a  
464 value for every node in SPOKE that is equivalent to the amount of time the walker spent  
465 on each given node.

466

## 467 **BMI GWAS**

468 Genes were selected from the GWAS Catalog if they were associated with an increase in  
469 BMI and were genome wide significant.

470

## 471 **Disease Benchmark**

### 472 **Generating Disease PSEV matrix for benchmark**

473 We created *Disease* benchmark PSEV matrix ( $PSEV^{\Delta DD, \Delta DG}$ ) by removing the  
474 *Disease-Disease* and *Disease-Gene* relationships in SPOKE prior to PSEV creation. We  
475 then used z-scores to normalize the  $PSEV^{\Delta DD, \Delta DG}$  and ranked the elements for each type  
476 of node.

477

### 478 **Random Disease matrix**

479 In order to test the importance of the edges between SEPs and SPOKE as well as  
480 SPOKE's internal edges, we generated three types of random PSEVs. First, we created a  
481 completely random PSEV matrix by using the Fisher–Yates method to permute the  
482 SPOKE nodes for each *Disease* PSEV ( $PSEV^{random}$ ). Second, for each edge type in  
483 SPOKE, we randomly shuffled the edges prior to PSEV creation ( $PSEV^{shuffled\_SPOKE}$ ).  
484 Third, we shuffled the edges between the SEPs and SPOKE prior to PSEV creation  
485 ( $PSEV^{shuffled\_SEP}$ ). It should be noted that when creating  $PSEV^{shuffled\_SEP}$ , all SPOKE  
486 relationships were maintained. Additionally, SEP-SPOKE edges were only shuffled once  
487 and therefore any relationships coming directly from the merged EHRs to the SEPs  
488 would be conserved. Once random PSEVs were created they were normalized using z-  
489 scores

490

## 491 **Inferring Disease-Gene Relationships From PSEVs**

492 In addition to looking at *Disease-Disease* relationships, we examined the ability  
493 of PSEVs to rank the *Disease-ASSOCIATES\_DaG-Gene* relationships from SPOKE.  
494 The *Disease-ASSOCIATES\_DaG-Gene* edges (n=12,623) in SPOKE come from four  
495 sources: the GWAS Catalog (MacArthur et al., 2017), DISEASES (Pletscher-Frankild et  
496 al., 2015), DisGeNET (Piniro et al., 2015; Piniro et al., 2016), and DOAF (Xu et al.,  
497 2012).

498 After z-score normalizing the PSEV matrix, within each *Disease PSEV*, *Genes*  
499 were ranked 1 to 5,392 or 20,945 when using only *Genes* that are associated with at least  
500 one *Disease* or the full set of *Genes* accordingly, such that a *Gene* ranked 1 would denote  
501 the most important *Gene* for a given *Disease* based on the PSEV matrix. Then for each  
502 *Disease PSEV*, K *Genes* were selected where K was equal to the number of *Genes* are  
503 associated with a given *Disease*. The p-values for ability of each *Disease PSEV* to  
504 correctly rank the associated *Genes* were then combined using Fisher's method (Fisher  
505 1992). This evaluation was applied to the original PSEV, benchmark PSEV, and all three  
506 random networks (Figure 4A-B).

507

## 508 **Creating Disease-Gene heat map.**

509 The  $PSEV^{\Delta DD, \Delta DG}$  matrix was filtered such that it only contained *Disease PSEVs*  
510 and the *Gene* elements that are associated with at least one *Disease* in SPOKE (m=137,  
511 n=5,392). This was then used as input into the seaborn clustermap package in python  
512 with the settings method='average' and metric='euclidean'.

513

## 514 **Shortest paths between SEP to target nodes.**

515 To understand how the PSEVs were able to recover deleted relationships we  
516 traced from the target node back to the contributions of each SEP. To achieve this, we z-  
517 score normalized the original SEP transition matrix used to calculate the PSEVs. Then we  
518 created a SPOKE only PSEV matrix ( $PSEV^{SPOKE-only}$ ) that forces the random walker to  
519 randomly restart (B=0.33) from a single SEP. The  $PSEV^{SPOKE-only}$  matrix was create using  
520 SPOKE with deleted *Disease-Disease* and *Disease-Gene* edges or *Compound-Compound*  
521 and *Compound-Gene* edges when recovering the paths for  $PSEV^{\Delta DD, \Delta DG}$  and  $PSEV^{\Delta CC}$ .

522  $\Delta_{CG}$  accordingly. The  $PSEV^{SPOKE-only}$  matrix allows to identify the contribution of an  
523 individual SEP to any of the downstream nodes. We then took the product of a given  
524 *Disease* or *Compound* transposed vector from the SEP transition matrix with the  
525  $PSEV^{SPOKE-only}$  to generate contributions of each SEP to the target node. The most  
526 important SEP were selected if they were in the top 0.1 percentile of contributors. We  
527 then found the shortest paths between the important SEPs and the target node.  
528  
529

## 530 SUPPLEMENTARY TEXT

531

### 532 **Inferring *Disease-Disease* Relationships From PSEVs**

533 Utilizing the normalized original matrix (PSEV), benchmark matrix (PSEV<sup>ADD, ΔDG</sup>,  
534 <sup>ΔDG</sup>) and the three random PSEV matrices, we checked to see if the deleted SPOKE  
535 *Disease-RESEMBLES\_DrD-Disease* edges could be inferred directly from the PSEV  
536 matrices. The *Disease-RESEMBLES\_DrD-Disease* edges in SPOKE were derived using  
537 MEDLINE co-occurrences (n=1,086). This evaluation mirrors that used to test the  
538 recovered *Disease-Gene* relationships. However, in this case the *Diseases* elements  
539 (n=129 using Diseases that resemble at least one other Disease or n=137 for entire set of  
540 Diseases in SPOKE) in each *Disease* PSEV were ranked such that the one ranked 1  
541 would denote the most similar to a given *Disease*. All PSEV matrices were evaluated  
542 using this method (Supplementary Figure 2).

543

### 544 **Recovering Deleted *Disease* Resembles *Disease* Relationships**

545 We next used PSEV to create a *Disease-Disease* network (DD<sup>PSEV</sup>) as we did the  
546 *Disease-Gene* networks and used a similar strategy to build background networks as  
547 comparators (DD<sup>PSEVADD, ΔDG</sup>, DD<sup>RANDOM</sup>, DD<sup>SPOKE SHUFFLE</sup>, and DD<sup>SEP SHUFFLE</sup>) using the  
548 original, benchmark and three random PSEV matrices. These *Disease-Disease* networks  
549 were then evaluated by the number of edges they shared with the *Disease-RESEMBLES\_*  
550 *Disease\_(DrD)-network* from SPOKE (DD<sup>SPOKE</sup>). The RESEMBLES\_DrD edges in  
551 SPOKE were created using the most statistically significant MEDLINE term co-  
552 occurrences (n=1,086, p<0.005; Himmelstein et al. 2017). Again, we found that DD<sup>PSEV</sup>  
553 (and even DD<sup>PSEVADD, ΔDG</sup>) was able to recover more of the deleted edges (on average  
554 4.7x and 3.7x accordingly) than any of the three random networks (Supplementary Figure  
555 2B).

556 Interestingly, one of the three random networks (DD<sup>SPOKE SHUFFLE</sup>) performed  
557 significantly better than the other two. We hypothesize this is due to the fact that some  
558 *Disease-Disease* relationships are observable in the EHRs as co-morbidities and  
559 misdiagnoses. This information is then feed directly into the *Disease* SEPs, making  
560 *Diseases* that resemble other *Diseases* significant in the PSEVs. Since this relationship

561 does not always need to traverse paths in SPOKE, it is observable in the  $DD^{\text{SPOKE SHUFFLE}}$ .  
562 In contrast, in  $DD^{\text{SEP SHUFFLE}}$  the altered mappings between the SEPs and SPOKE disrupt  
563 observable relationships in the EHRs, which in turn inhibits the prioritization of *Disease*  
564 nodes. These results highlight the accuracy of the mappings between EHR concepts to  
565 nodes in SPOKE.

566 Additionally, in order to learn how we are able to correctly identify related  
567 *Diseases* even after deleting *Disease-Gene* and *Disease-Disease* edges from SPOKE, we  
568 retraced the shortest paths between significant SEPs of a given *Disease* to its target  
569 related *Disease(s)*. Figure 2A shows how Hypertension was ranked as a top *Disease* in  
570 the Type 2 Diabetes  $PSEV^{\Delta DD, \Delta DG}$ . The “pressure” from the EHRs of Type 2 Diabetes  
571 patients pushes the flow of information to the *Anatomy* in which Hypertension is  
572 localized, *Symptoms* presented by Hypertension, and *Compounds* that treat or palliate  
573 Hypertension. This flow of information makes Hypertension a top ranked *Disease* for  
574 Type 2 Diabetes. Further, this pattern of information flow, particularly through *Anatomy*  
575 and *Symptom* nodes, is very conserved in the shortest paths between *Disease* pairs.

576

### 577 **Compound Benchmark**

#### 578 **Compound-Compound PSEV Based Network**

579 We created *Compound* benchmark PSEVs ( $PSEV^{\Delta CC, \Delta CG}$ ) by removing the  
580 *Compound-Compound* and *Compound-Gene* relationships in SPOKE prior to PSEV  
581 creation. We then used z-scores to normalize the  $PSEV^{\Delta CC, \Delta CG}$ .

582

#### 583 **Random Compound PSEVs**

584 The three random *Compound* PSEV matrices were derived in the same way as the  
585 random *Disease* PSEV matrices. First,  $PSEV^{\text{RANDOM}}$  was created by permuting the nodes  
586 in the *Compound* PSEVs using the Fisher–Yates method. Second,  $PSEV^{\text{SPOKE Shuffle}}$  was  
587 created by shuffling the edges within SPOKE, by edge type. Third,  $PSEV^{\text{SEP Shuffle}}$  was  
588 created by shuffling the edges between SEPs and SPOKE, by edge type. Neither  
589 *Compound-Compound* or *Compound-Gene* edges were deleted prior to random PSEV  
590 calculation. All random PSEV matrices were then z-score normalized.

591

## 592 **Inferring *Compound-Protein* binding partners using EHR embeddings.**

593       Employing the original matrix (PSEV), benchmark matrix ( $PSEV^{\Delta CC, \Delta CG}$ ) and  
594 three random matrices ( $PSEV^{random}$ ,  $PSEV^{shuffled\_SPOKE}$ , and  $PSEV^{shuffled\_SEP}$ ) we tested  
595 whether the molecular targets of a given compound were ranked higher in that  
596 *Compound's* PSEV. To test this we used the *Compound-BINDS\_CbG-Gene* edges in  
597 SPOKE which were derived from a *Compound's* protein targets from BindingDB (Chen  
598 et al., 2001; Gilson et al., 2016), DrugBank (Law et al., 2014; Wishart et al., 2006), and  
599 DrugCentral (Ursu et al., 2017) (11,571 edges).

600       Though this method of evaluation is very similar to the previous methods, it  
601 differed in that we selected a fixed number of top K ranked nodes to select from each  
602 *Compound* PSEV (K=150). The decision to choose a fixed K was based on the fact that  
603 the average number of Gene binding partners per Compound was much smaller than the  
604 average number of Genes that associate with Diseases. The value of K was calculated by  
605 finding the point at which the patient population no longer contributes positively to the  
606 rank of the target *Gene*. The simplest way to calculate patient contribution to the target  
607 *Gene* is through proportion of patients on a given *Compound* that have been diagnosed  
608 with a *Disease* that is related to the target Gene (Supplementary Fig 3C). This is  
609 computed by z-score normalizing the transition probability matrix and summing the  
610 values of *Diseases* that are related to the target *Gene* for a given *Compound*. We then plot  
611 the aggregated z-scores against rank to find the point in which the aggregated z-scores  
612 reaches zero (K=150; Supplementary Fig 3C).

613       Interestingly, we found that the most significant negative information flow (right  
614 end of the plot) was associated with the worst ranked *Genes* and often corresponded to  
615 contraindications. For example, Tolmetin, a non-steroidal anti-inflammatory drug, targets  
616 *PTGS1* - a gene known to be related to hypertension (Radi, Z., et al. 2007; Bruno, A., et  
617 al. 2014; Supplementary Fig 3A). However, Tolmetin is contraindicated for hypertension  
618 because it increases the risk of adverse cardiovascular events. As a result, within the  
619 population of patients that were prescribed Tolmetin, the number of patients that were  
620 also diagnosed with hypertension was fewer than expected. This causes negative  
621 information flow through *PTGS1* in the Tolmetin PSEV.

622

623           Next, selecting the top 150 *Genes* per *Compound PSEV*, we built *Compound-*  
624 *Gene* networks using the original ( $CG^{PSEV}$ ), benchmark ( $CG^{PSEV\Delta CC, \Delta CG}$ ), and three  
625 random PSEV matrices ( $CG^{RANDOM}$ ,  $CG^{SPOKE SHUFFLE}$ , and  $CG^{SEP SHUFFLE}$ ) respectively.  
626 We then compared the number of overlapping edges between the  $CG^{SPOKE}$ , a *Compound-*  
627 *Gene* network created with the *Compound-BINDS\_CbG-Gene* edges in SPOKE, and the  
628 other CG networks. When selecting the top K *Genes* using only *Genes* that have at least  
629 one BINDS\_DbG edge, we found that  $CG^{PSEV\Delta CC, \Delta CG}$  and  $CG^{PSEV}$  shared on average 1.9x  
630 and 6.9x more edges than the three random networks (Supplementary Fig. 3B) and when  
631 selecting the top K from all Gene nodes in SPOKE, the sharing increased to 4.3x and  
632 51.5x respectively (Supplementary Fig. 3B insert). These results show that adding patient  
633 information from the EHRs enables the discovery of Compound-Gene relationships in  
634 SPOKE.

635           Finally, to unravel how *Compound* binding partners are highly ranked in PSEVs  
636 even after *Compound-Gene* and *Compound-Compound* edges are deleted, we again  
637 retraced the shortest paths between significant SEPs and the target *Gene*.  
638 Ursodeoxycholic acid is a cholesterol-lowering medication that can also be used to  
639 dissolve gallstones and treat liver disorders and is known to target the protein ABCB11, a  
640 member of the superfamily of ATP-binding cassette (ABC) transporters (Green et al.,  
641 2000; Schuetz et al., 2001; Mita et al., 2005). Supplementary Figure 3A shows how  
642 EHRs from patients prescribed Ursodeoxycholic acid guide the flow of information to  
643 ABCB11. The information is driven towards *BiologicalProcess* and *Pathway* nodes that  
644 ABCB11 participates in and *Diseases* that are localized in *Anatomies* that ABCB11 is  
645 expressed or regulated in. Since *Gene* nodes only represent a small fraction of SEPs, this  
646 pattern of flow from SEP to target *Gene* is not very common because it includes a *Gene*  
647 node (gamma-glutamyltransferase 1, *GGT*) as one of the SEPs. High levels of GGT are  
648 often associated with liver or bile duct diseases, which explains why patients may benefit  
649 from this drug, as well as informs the connection to ABCB11. More commonly, the  
650 shortest paths will involve information flow through *Disease*, *Anatomy*, and occasionally  
651 *Gene* nodes.

652

653 ***Compound* fingerprint similarity in EHR embeddings.**



654 Analogous to generating the *Disease-Disease* networks, we created *Compound-*  
655 *Compound* networks using the top K ranked *Compound* nodes in the original ( $CC^{PSEV}$ ),  
656 benchmark ( $CC^{PSEV\Delta CC, \Delta CG}$ ), or random PSEV ( $CC^{RANDOM}$ ,  $CC^{SPOKE SHUFFLED}$ , and  $CC^{SEP}$   
657  $SHUFFLED$ ) matrices, where K equals the number of similar Compounds to a selected  
658 Compound. Then we created a fingerprint-based *Compound-Compound* network  
659 ( $CC^{SPOKE}$ ) using the *Compound-RESEMBLES\_CrC-Compound* edges (n=7,703) in  
660 SPOKE. The *Compound-RESEMBLES\_CrC-Compound* edges in SPOKE were derived  
661 using the similarity between two Compounds extended connectivity fingerprints (Rogers  
662 and Hahn, 2010; Morgan, 1965) and filtered based on their Dice coefficient (Dice, 1945;  
663 Himmelstein et al. 2017). Next, we computed the number of edges that were shared  
664 between  $CC^{SPOKE}$  and the other *Compound-Compound* networks. We found that the  
665 observed number of shared edges in  $CC^{PSEV\Delta CC, \Delta CG}$  and  $CC^{PSEV}$  were on average  
666 significantly higher than random (4.4x and 15.2x) when selecting from the set of  
667 Compounds that resembles at least one other Compound and even higher (4.9x and  
668 17.6x) when selecting from the entire set of nodes in SPOKE (Supplementary Figure 4B).  
669 Again the p-values in the figure were calculated using Fisher's method to combine the p-  
670 values for selecting the top K *Compounds* from each *Compound*  $PSEV^{\Delta CC, \Delta CG}$ .

671 Just as when we inferred *Disease-Disease* relationships, we noticed that  $CC^{SPOKE}$   
672  $SHUFFLED$  performed better than the other two random networks. Again, this is likely  
673 because we attempted to predict relationships that can sometimes be observed without  
674 traversing SPOKE because they are observable in the EHRs. Therefore, shuffling the  
675 edges within SPOKE won't greatly impact this prediction. Furthermore, these results also  
676 demonstrate that we are correctly mapping medication orders in the EHRs to *Compound*  
677 nodes in SPOKE.

678 To elucidate how the benchmark PSEVs could infer whether two compounds  
679 were similar, we again found the shortest paths between the important SEPs and target  
680 (*Compound*) node. We found that in order to connect Compounds, the random walker  
681 usually followed one of two path patterns. In one pattern, the information from the patient  
682 population on a given *Compound* is "pushed" through shared *SideEffects* and  
683 *PharmacologicalClasses*. For example, Tioconazole resembles Sertaconazole  
684 (similarity=0.80) and in order to connect the two Compounds pressure from patients on

685 Tioconazole must move information flow through the *SideEffects* Pruritus, Erythema,  
686 Dry skin, and Application site reaction and the *PharmacologicalClass* Azoles  
687 (Supplementary Fig. 4A left). The other shortest path pattern for recovering similar  
688 *Compounds* is observed when two *Compounds* treat the same *Disease*. An example of  
689 this is seen when connecting Trihexyphenidyl to Procyclidine (similarity=0.98;  
690 Supplementary Fig. 4A right) which both are used to treat Parkinson's disease (PD).  
691 Here, most of the weight from the EHRs of patients on Trihexyphenidyl is coming from  
692 PD and nodes related to PD: Trihexyphenidyl (*Compound* treats PD), Dyskinesias  
693 (*Symptom* presented by PD), and Tremor (*Symptom* presented by PD). This results in  
694 significant information flow to the Procyclidine node. These results prove the PSEVs  
695 ability to identify *Compounds* with similar structures as well as illustrate what  
696 components of the EHRs and relationships of SPOKE are most critical to inform that  
697 decision.

698

#### 699 **SideEffect to Anatomy Benchmark**

##### 700 **MEDLINE Co-occurrence Gold Standard**

701 MEDLINE yearly publishes the co-occurrences of MeSH terms found on  
702 Pubmed publications. After converting *Anatomy* and *SideEffect* identifiers to MeSH IDs  
703 we created a counts matrix for co-occurring *Anatomy* and *SideEffect* terms. Out of the  
704 699,745 possible pairs, 222,224 had at least one co-occurrence). Then we performed  $\chi^2$  to  
705 determine the significance of the *Anatomy-SideEffect* MEDLINE relationships. Since  
706 51% of relationships had a p-value less than or equal to 0.05, we decided to strengthen  
707 the filter to the top 5% of p-values (p=7.4E-75) leaving 11,112 *Anatomy-SideEffect* pairs.

708

##### 709 **PSEV Benchmark *Anatomy-SideEffect* Network**

710 First, we used z-score to normalize the PSEV matrix. Then we transposed the  
711 PSEV matrix (PSEV<sup>T</sup>) to obtain a vector (n=3,233) for every node in SPOKE. This  
712 vector describes the importance of a given SPOKE node for each SPOKE Entry Point  
713 (SEPs). Next, vectors from PSEV<sup>T</sup> were then used to calculate the cosine similarity  
714 between *Anatomy* and *SideEffect* nodes. Finally, the similarities were ranked (1 to

715 699,745), such that a rank of 1 signified the most similar *Anatomy-SideEffect* pair in the  
716 matrix.

717

### 718 **Random *Anatomy-SideEffect* Networks**

719 To create a random  $PSEV^T$  matrix, the normalized benchmark  $PSEV^T$  was  
720 shuffled using the Fisher–Yates method to randomly permute the rows of the matrix. The  
721 random PSEV matrix was then used to calculate the cosine similarity between the  
722 *Anatomy-SideEffect* pairs and ranked from 1 to 699,745 in the same way as the  
723 benchmark matrix.

724

### 725 **Overlapping *Anatomy-SideEffect* Links**

726 Benchmark and random *Anatomy-SideEffect* networks were created using the top  
727  $k$  ( $k=1$  to 699,745, increasing in intervals of 5%) nodes in  $PSEV$  and  $PSEV^{RANDOM}$   
728 accordingly. Supplementary Figure 5 shows the overlapping counts and fraction between  
729 the RP networks and the 11,112 *Anatomy-SideEffect* pairs from MEDLINE. Inserts in  
730 Supplementary Figures 5A-C focus on  $k \leq 11,112$ , corresponding the number of  
731 *Anatomy-SideEffect* pairs from MEDLINE. The highest fold changes 18.1 over random  
732 occurred in the top  $k=1,000$  respectively (Supplementary Figure 5C insert).

733

### 734 **Recovering the major shortest paths between *SideEffect* and *Anatomy* nodes**

735 First, we needed to find the nodes that contributed most weight to the similarity of  
736 the *SideEffect- Anatomy* pair. Since we used cosine similarity, which is equivalent to the  
737 dot product of two unit vectors, we simply multiplied the *SideEffect* and *Anatomy*  
738 transposed PSEVs and selected the highest 0.1% of nodes. Those nodes are labeled as top  
739 contributors in Supplementary Figures 5D-F. We then found the shortest paths between  
740 each top contributor node and the target *SideEffect* and *Anatomy* nodes.

741

### 742 ***SideEffect-Anatomy* relationships in embedded EHR concepts match MEDLINE co- 743 occurrences.**

744 Although it is natural to draw a connection between drug side effects and the  
745 anatomies they affect (e.g. a headache must somehow relate to the brain), *SideEffect* and

746 *Anatomy* nodes are not directly connected in SPOKE. In fact, in order to get from a  
747 *SideEffect* to an *Anatomy* node one must traverse a minimum of three edges. As a result,  
748 correctly inferring the relationships between *Anatomy* and *SideEffect* nodes would show  
749 that appropriate weights are assigned to distant nodes in the network. To test this, we  
750 created a gold standard *SideEffect-Anatomy* network using only highly significant  
751 relationships from MEDLINE co-occurrences ( $\text{SeA}^{\text{MEDLINE}}$ ) ( $p=7.4e-75$ ;  $n=11,112$ ; avg  
752 6.4 *Anatomy* per *SideEffect*). Next, we computed a *SideEffect-Anatomy* cosine similarity  
753 matrix using the transposed PSEV matrix (See methods). We then selected the most  
754 similar *SideEffect-Anatomy* pairs to create a PSEV-based *SideEffect-Anatomy* network  
755 ( $\text{SeA}^{\text{PSEV}}$ ). These relationships were also tested against a random network ( $\text{SeA}^{\text{RANDOM}}$ )  
756 that was generated by permuting each PSEV, as in the  $\text{DD}^{\text{RANDOM}}$  networks  
757 (Supplementary Figure 5).

758 In the first interval ( $k=1000$ ), we observed 18.1 times more overlapping edges  
759 than expected by chance (Supplementary Figure 5C insert; binomial  $p$  value =  $9.7E-251$ ).  
760 By accurately ranking the relationships between *SideEffect* and *Anatomy* nodes, we  
761 further demonstrate that PSEVs are a valid strategy to infer missing links in SPOKE. This  
762 result is even more consequential given that *SideEffect* and *Anatomy* nodes are far away  
763 in SPOKE.

764 Similar to before when we found the shortest paths between SEPs and the target  
765 node to understand how deleted edges were recovered, we wanted to find the paths that  
766 enabled us to learn relationships between *SideEffect* and *Anatomy* nodes. To achieve this,  
767 we found the nodes in the transposed PSEVs that contributed the most to the *SideEffect*  
768 and *Anatomy* similarity. We then looked at the shortest paths between those nodes and  
769 the target *SideEffect* and *Anatomy* nodes. Supplementary Figures 5D-F show examples of  
770 these paths. The first example shows how Aggression connects to locus coeruleus (LC), a  
771 part of the brain that is involved in emotions, arousal, attention, and stress response  
772 (Benarroch E., 2009). The nodes that contribute the most to the similarity are *Compounds*  
773 and all have the *SideEffect* Aggression. Additionally, those *Compounds* bind or regulate  
774 *Genes* expressed or regulated in the LC as well as treat or palliate *Diseases* localized in  
775 the LC (Supplementary Fig 5D). Similarly, Supplementary Figure 5E shows the  
776 connection between Anxiety (*SideEffect*) and the LC (*Anatomy*). Interestingly, the

777 shortest paths between Anxiety or Aggression to the LC only share three nodes: alcohol  
778 dependence, epilepsy syndrome, and hypertension. The final example shows the  
779 connections between fetal heart rate (*SideEffect*) and the umbilical artery (*Anatomy*)  
780 (Supplementary Fig. 5F). This connection is centered on a set of genes that are associated  
781 or regulated by Diseases localized in umbilical artery. Those same *Genes* are also targets  
782 of or regulated by *Compounds* that impact fetal heart rate. These examples further show  
783 that PSEVs can be used to find related biomedical entities and further our understanding  
784 of how and why they are connected.

785

786

787

788

789 **ACKNOWLEDGEMENTS**

790 We thank Sourav Bandyopadhyay, Riley Bove, Jeffrey Gelfand, Sharat Israni, and Keith  
791 Yamamoto for helpful discussions. Partial support for this work was provided by grants  
792 from Genentech to A.J.B () and S.E.B (G-54860). The sponsor had no role in the design  
793 or implementation of this study. Additionally, we would like to thank Achievement  
794 Rewards for College Scientists (ARCS) Scholarship and the NHI BMI Training Grant  
795 (T32 GM067547/ 4T32GM067547-14). SEB holds the Heidrich Family and Friends  
796 Endowed Chair of Neurology at UCSF.

797

798

799 **REFERENCES**

- 800 1. Barabási, Albert-László, Natali Gulbahce, and Joseph Loscalzo. "Network  
801 medicine: a network-based approach to human disease." *Nature reviews. Genetics*  
802 12.1 (2011): 56.
- 803 2. Benarroch, Eduardo E. "The locus ceruleus norepinephrine system Functional  
804 organization and potential clinical significance." *Neurology* 73.20 (2009): 1699-  
805 1704.
- 806 3. Bodenreider O. 2004. The Unified Medical Language System (UMLS):  
807 integrating biomedical terminology. *Nucleic Acids Research* 32:267D–270. DOI:  
808 <https://doi.org/10.1093/nar/gkh061>, PMID: 14681409
- 809 4. Bruno, Annalisa, Stefania Tacconelli, and Paola Patrignani. "Variability in the  
810 response to non-steroidal anti-inflammatory drugs: mechanisms and  
811 perspectives." *Basic & clinical pharmacology & toxicology* 114.1 (2014): 56-63.
- 812 5. Can, Tolga, Orhan Çamoğlu, and Ambuj K. Singh. "Analysis of protein-protein  
813 interaction networks using random walks." *Proceedings of the 5th international*  
814 *workshop on Bioinformatics. ACM, 2005.*
- 815 6. Cao, H., Hripcsak, G. & Markatou, M. A statistical methodology for analyzing  
816 co-occurrence data from a large sample. *J. Biomed. Inform.* 40, 343–352 (2007).
- 817 7. Chen, David P., et al. "Novel integration of hospital electronic medical records  
818 and gene expression measurements to identify genetic markers of maturation."  
819 *Pacific Symposium on Biocomputing. Pacific Symposium on Biocomputing. NIH*  
820 *Public Access, 2008.*
- 821 8. Chen, Xi, Ming Liu, and Michael K. Gilson. "BindingDB: a web-accessible  
822 molecular recognition database." *Combinatorial chemistry & high throughput*  
823 *screening* 4.8 (2001): 719-725.
- 824 9. Chen, Ying, JD Elenee Argentinis, and Griff Weber. "IBM Watson: how  
825 cognitive computing can be applied to big data challenges in life sciences  
826 research." *Clinical therapeutics* 38.4 (2016): 688-701.
- 827 10. Colijn, Caroline, et al. "Toward Precision Healthcare: Context and Mathematical  
828 Challenges." *Frontiers in physiology* 8 (2017).

- 829 11. Denny, Joshua C., et al. "PheWAS: demonstrating the feasibility of a phenome-  
830 wide scan to discover gene-disease associations." *Bioinformatics* 26.9 (2010):  
831 1205-1210.
- 832 12. Dice, Lee R. "Measures of the amount of ecologic association between species."  
833 *Ecology* 26.3 (1945): 297-302.
- 834 13. Fisher, R. A. S. & Yates, F. *Statistical Tables for Biological, Agricultural and*  
835 *Medical Research* 2nd edn revised and enlarged (Oliver & Boyd, 1943).
- 836 14. Fisher, Ronald Aylmer. "Statistical methods for research workers." *Breakthroughs*  
837 *in statistics*. Springer, New York, NY, 1992. 66-70.
- 838 15. Gilson, Michael K., et al. "BindingDB in 2015: a public database for medicinal  
839 chemistry, computational chemistry and systems pharmacology." *Nucleic acids*  
840 *research* 44.D1 (2015): D1045-D1053.
- 841 16. Goh, Kwang-Il, et al. "The human disease network." *Proceedings of the National*  
842 *Academy of Sciences* 104.21 (2007): 8685-8690.
- 843 17. Green, Richard M., Farzana Hoda, and Kristine L. Ward. "Molecular cloning and  
844 characterization of the murine bile salt export pump." *Gene* 241.1 (2000): 117-  
845 123.
- 846 18. Hashmi, H.A. and Rius, G. and Gilge, M. and Redbooks, IBM. "Regain Control  
847 of your Environment with IBM Storage Insights." *IBM Redbooks*. (2017): 2.
- 848 19. Haveliwala, Taher H. "Topic-sensitive pagerank." *Proceedings of the 11th*  
849 *international conference on World Wide Web*. ACM, 2002.
- 850 20. Himmelstein, Daniel S., and Sergio E. Baranzini. "Heterogeneous network edge  
851 prediction: a data integration approach to prioritize disease-associated genes."  
852 *PLoS computational biology* 11.7 (2015): e1004259.
- 853 21. Himmelstein, Daniel S., et al. "Systematic integration of biomedical knowledge  
854 prioritizes drugs for repurposing." *bioRxiv* (2016): 087619.
- 855 22. Kho, Abel N., et al. "Electronic medical records for genetic research: results of  
856 the eMERGE consortium." *Science translational medicine* 3.79 (2011): 79re1-  
857 79re1.



- 858 23. Kibbe, Warren A., et al. "Disease Ontology 2015 update: an expanded and  
859 updated database of human diseases for linking biomedical knowledge through  
860 disease data." *Nucleic acids research* 43.D1 (2014): D1071-D1078.
- 861 24. Köhler, Sebastian, et al. "Walking the interactome for prioritization of candidate  
862 disease genes." *The American Journal of Human Genetics* 82.4 (2008): 949-958.
- 863 25. Lao, Ni, Tom Mitchell, and William W. Cohen. "Random walk inference and  
864 learning in a large scale knowledge base." *Proceedings of the Conference on  
865 Empirical Methods in Natural Language Processing. Association for  
866 Computational Linguistics*, 2011.
- 867 26. Law V, Knox C, Djoumbou Y, Jewison T, Guo AC, Liu Y, Maciejewski A, Arndt  
868 D, Wilson M, Neveu V, Tang A, Gabriel G, Ly C, Adamjee S, Dame ZT, Han B,  
869 Zhou Y, Wishart DS. 2014. DrugBank 4.0: shedding new light on drug  
870 metabolism. *Nucleic Acids Research* 42:D1091–D1097.
- 871 27. MacArthur, Jacqueline, et al. "The new NHGRI-EBI Catalog of published  
872 genome-wide association studies (GWAS Catalog)." *Nucleic acids research*  
873 45.D1 (2016): D896-D901.
- 874 28. McDonald, Clement J., et al. "LOINC, a universal standard for identifying  
875 laboratory observations: a 5-year update." *Clinical chemistry* 49.4 (2003): 624-  
876 633.
- 877 29. Mita, Sachiko, et al. "Vectorial transport of bile salts across MDCK cells  
878 expressing both rat Na<sup>+</sup>-taurocholate cotransporting polypeptide and rat bile salt  
879 export pump." *American Journal of Physiology-Gastrointestinal and Liver  
880 Physiology* 288.1 (2005): G159-G167.
- 881 30. Morgan, H. L. "The generation of a unique machine description for chemical  
882 structures-a technique developed at chemical abstracts service." *Journal of  
883 Chemical Documentation* 5.2 (1965): 107-113.
- 884 31. National Research Council. "Toward precision medicine: building a knowledge  
885 network for biomedical research and a new taxonomy of disease." (2011).
- 886 32. Page, Lawrence, et al. "The PageRank citation ranking: Bringing order to the  
887 web." (1999).

- 888 33. Piñero, Janet, et al. "DisGeNET: a comprehensive platform integrating  
889 information on human disease-associated genes and variants." *Nucleic acids*  
890 *research* (2016): gkw943.
- 891 34. Piñero, Janet, et al. "DisGeNET: a discovery platform for the dynamical  
892 exploration of human diseases and their genes." *Database* 2015 (2015).
- 893 35. Pletscher-Frankild, Sune, et al. "DISEASES: Text mining and data integration of  
894 disease–gene associations." *Methods* 74 (2015): 83-89.
- 895 36. Radi, Zaher A., and Robert Ostroski. "Pulmonary and cardiorenal  
896 cyclooxygenase-1 (COX-1),-2 (COX-2), and microsomal prostaglandin E  
897 synthase-1 (mPGES-1) and-2 (mPGES-2) expression in a hypertension model."  
898 *Mediators of inflammation* 2007 (2007).
- 899 37. Ritchie, Marylyn D., et al. "Robust replication of genotype-phenotype  
900 associations across multiple diseases in an electronic medical record." *The*  
901 *American Journal of Human Genetics* 86.4 (2010): 560-572.
- 902 38. Rogers, David, and Mathew Hahn. "Extended-connectivity fingerprints." *Journal*  
903 *of chemical information and modeling* 50.5 (2010): 742-754.
- 904 39. Schriml, Lynn Marie, et al. "Disease Ontology: a backbone for disease semantic  
905 integration." *Nucleic acids research* 40.D1 (2011): D940-D946.
- 906 40. Schuetz, Erin G., et al. "Disrupted bile acid homeostasis reveals an unexpected  
907 interaction among nuclear hormone receptors, transporters and cytochrome  
908 P450." *Journal of Biological Chemistry* (2001).
- 909 41. Schweder, T. & Spjotvoll, E. Plots of p-values to evaluate many tests  
910 simultaneously. *Biometrika* 69, 493–502 (1982).
- 911 42. Shickel, Benjamin, et al. "Deep EHR: A survey of recent advances in deep  
912 learning techniques for electronic health record (EHR) analysis." *IEEE journal of*  
913 *biomedical and health informatics* 22.5 (2018): 1589-1604.
- 914 43. Sinha, Arnab, et al. "An overview of microsoft academic service (mas) and  
915 applications." *Proceedings of the 24th international conference on world wide*  
916 *web*. ACM, 2015.
- 917 44. Steindel, Steven J. "International classification of diseases, clinical modification  
918 and procedure coding system: descriptive overview of the next generation HIPAA

- 919 code sets." *Journal of the American Medical Informatics Association* 17.3 (2010):  
920 274-282
- 921 45. Subramanian, Aravind, et al. "*Gene set enrichment analysis: a knowledge-based*  
922 *approach for interpreting genome-wide expression profiles.*" *Proceedings of the*  
923 *National Academy of Sciences* 102.43 (2005): 15545-15550.
- 924 46. Ursu O, Holmes J, Knockel J, Bologna CG, Yang JJ, Mathias SL, Nelson SJ,  
925 Oprea TI. 2017. DrugCentral: online drug compendium. *Nucleic Acids Research*  
926 45:D932–D939.
- 927 47. Valentini, Giorgio, et al. "An extensive analysis of disease-gene associations  
928 using network integration and fast kernel-based gene prioritization methods."  
929 *Artificial Intelligence in Medicine* 61.2 (2014): 63-78.
- 930 48. Wang, Lili, et al. "PINBPA: Cytoscape app for network analysis of GWAS data."  
931 *Bioinformatics* 31.2 (2014): 262-264.
- 932 49. Wishart DS, Knox C, Guo AC, Shrivastava S, Hassanali M, Stothard P, Chang Z,  
933 Woolsey J. 2006. DrugBank: a comprehensive resource for in silico drug  
934 discovery and exploration. *Nucleic Acids Research* 34:D668–D672
- 935 50. Xu, Wei, et al. "A framework for annotating human genome in disease context."  
936 *PLoS One* 7.12 (2012): e49686.
- 937 51. Zhou, XueZhong, et al. "Human symptoms–disease network." *Nature*  
938 *communications* 5 (2014): 4212.  
939  
940  
941  
942

943 **Captions for figures**

944 **Figure 1 Embedding EHR concepts in a knowledge network. (A)** Distribution of  
945 patient BMIs at UCSF. Four BMI cohorts were created using K-means clustering of  
946 BMI (boxes I-IV:  $\leq 19$ , 19.1-25.5, 25.6-34.2, and  $>34.2$ ). Arrows at the bottom  
947 correspond to the BMIs that separate the standardize weight classes. **(B)** Step 1:  
948 find the overlapping concepts between SPOKE and the patient data (EHRs). These  
949 are called SPOKE Entry Points (SEPs). Step 2: choose any code or concept in the EHR  
950 to make cohort. Here we have chosen patients with a high BMI (Cohort IV). Then  
951 connect each patient in the cohort to all of the SEPs in their records. Step 3: perform  
952 PageRank such that the walker restarts in the patient cohort. Iterate until desired  
953 threshold is reached. Step 4: final node ranks are then used to create the weights in  
954 the Propagated SPOKE Entry Vector (PSEV).

955

956 **Figure 2 PSEVs contain phenotypic and genotypic information. (A)** BMI Cohort  
957 vs *Disease* Rank. The top 4 ranked *Diseases* in the in Cohort IV's PSEV are obesity,  
958 hypertension, type 2 diabetes mellitus, and metabolic syndrome X. All 4 show a positive  
959 relationship with BMI. The opposite trend is observed for celiac disease, Crohn's disease,  
960 and attention deficit disorder which are highly ranked in Cohort I's PSEV. **(B)** FTO gene  
961 is positively correlated with BMI. **(C)** The number of overlapping genes between the  
962 GWAS catalog for increased BMI and the top 365 of *Genes* in each BMI cohort PSEV.  
963 **(D)** The number of overlapping genes between BMI related GEO datasets and the top 119  
964 of *Genes* in each BMI cohort PSEV.

965

966 **Figure 3. Disease Cluster by Genetic Similarity. (A)** Heat map generated with the  
967 *Disease* PSEV<sup>ADD, ΔDG</sup> (only using elements of *Genes* that associate with at least one  
968 *Disease*). Both *Diseases* (rows) and *Genes* (columns) are clustered. *Disease* Cluster 4  
969 (n=18) is enriched in neurological diseases and shown in dark purple. **(B)** Magnification  
970 of the 197 *Genes* found in a top *Gene* Cluster (Cluster 6) for *Disease* Cluster 4. Asterisks  
971 above *Gene* symbols indicate how many *Diseases* in *Disease* Cluster 4 are associated  
972 with that *Gene*. Color bar signifies how many *Diseases* were associated with a given  
973 *Gene*. **(C)** Expected distributions for the number of *Genes* that are associated with at least

974 one, two, or three *Diseases* (1000 random permutations of 18 *Diseases* and 197 *Genes*).  
975 Arrows show the observed number over *Genes* within Gene Cluster 6 that are associated  
976 with at least one, two, or three *Disease* in Disease Cluster 4 and greatly exceed the  
977 expected number of *Genes* (fold change=2.0, 3.9, and 5.4 accordingly). **(D)** 15 *Genes* that  
978 are within Gene Cluster 6 are associated with three or more *Diseases* in Disease Cluster  
979 4.

980

981 **Figure 4. Recovering deleted Disease-Gene edges.** Prior to  $PSEV^{\Delta DD, \Delta DG}$  calculation all  
982 of the *Disease-Gene* and *Disease-Disease* edges were deleted from SPOKE. **(A)** The gold  
983 standard *Disease-Gene* network was made from the deleted edges in SPOKE. Plots show  
984 the number of *Disease-Gene* relationships using each of the PSEV matrices that overlap  
985 with the gold standard networks. The pink distributions show the results from the  
986 permuted PSEV matrices ( $PSEV^{Random}$ ; 1000 iterations) while the arrows show the results  
987 from the original PSEV (blue),  $PSEV^{\Delta DD, \Delta DG}$  (green),  $PSEV^{SPOKE\ SHUFFLED}$  (red), and  
988  $PSEV^{SEP\ SHUFFLED}$  (orange). **(A)** The top K *Genes* were selected from the set of *Genes* in  
989 the gold standard network or **(A insert)** the entire set of *Gene* nodes in SPOKE. **(B)** The  
990 breakdown of top Disease-Gene relationships as knowledge (edges) is added back to the  
991 network. **(C)** To uncover how the deleted *Disease-Gene* associations are recovered using  
992 the PSEVs we retraced the shortest path between the most important SPOKE Entry points  
993 (SEPs) and the desired Gene. Patients with *Disease X* put pressure on the SEPs (top). The  
994 SEPs that receive the most significant amount of pressure are colored by node type.  
995 Information then flows through other nodes in SPOKE (middle) before reaching the Gene  
996 that is genetically associated to *Disease X* (bottom). **(D)** In the GWAS catalog  
997 Schizophrenia and CSMD1 are associated. As outlined in B, the information flows from  
998 the significant SEPs of patients with Schizophrenia to CSMD1.

999

1000

1001 **Figure 5 MEDLINE Anatomy-SideEffect Relationships are Top Ranked Nodes in**  
1002 **PSEV.** Fraction **(A)**, count **(B)**, and fold change **(C)** of overlapping edges MEDLINE  
1003 *Anatomy-SideEffect* network and PSEV *Anatomy-SideEffect* network (blue) or random  
1004 PSEV *Anatomy-SideEffect* network (red) for different thresholds of PSEV disease

1005 similarity. **A-C** Are shown in 5% similarity intervals of ranked nodes starting with the  
1006 most similar 5% left and all nodes (100%) right. The inserts in **A-C** focus on the top  
1007 0.14-1.6% of ranked nodes. **D-F** Examples shortest paths connecting the nodes that  
1008 contribute the most to the *Anatomy-SideEffect* similarity to the target *SideEffect* and  
1009 *Anatomy* nodes.

1010

1011

1012

1013

1014

## 1015 SUPPLEMENTARY FIGURE LEGENDS AND TABLES

1016

1017 **Supplementary Figure 1. PSEVs embed first neighbors in SPOKE and learn new**  
1018 **relationships.** Imagine the SPOKE network as a set of water pipes and the SEPs as  
1019 input valves. Pressure from the patient population determines how much water can  
1020 flow through the valves. The water can then reach downstream SPOKE nodes. The  
1021 amount of water that flows through each SPOKE node will be specific to the selected  
1022 patient population. **(A)** Distribution of ranks in PSEV vectors for first neighbors  
1023 (blue) and non-first neighbors (red). **(B)** Multiple sclerosis first neighbors that  
1024 overlap with top PSEV rank (blue edges) or not in top PSEV rank (red). **(C)** The top  
1025 10 ranked nodes in the PSEV for each node types that don't directly connect to  
1026 Multiple sclerosis Disease node in SPOKE (dashed edges)

1027

1028 **Supplementary Figure 2. Recovering deleted *Disease-Disease* edges.** **(A)** shows how  
1029 the deleted *Disease-Disease* edge between Type 2 Diabetes and Hypertension is  
1030 recovered using the pressure generated from the Type 2 Diabetes patients. **(B)** The gold  
1031 standard *Disease-Disease* network was made from the deleted edges in SPOKE. Plots  
1032 show the number of *Disease-Disease* relationships using each of the PSEV matrices that  
1033 overlap with the gold standard network. The pink distributions show the results from the  
1034 permuted PSEV matrices ( $PSEV^{Random}$ ; 1000 iterations) while the arrows show the results  
1035 from the original PSEV (blue),  $PSEV^{\Delta DD, \Delta DG}$  (green),  $PSEV^{SPOKE SHUFFLED}$  (red), and  
1036  $PSEV^{SEP SHUFFLED}$  (orange). **(B)** The top K *Diseases* where selected from the set of  
1037 *Diseases* in the gold standard network or **(B insert)** the entire set of *Disease* in SPOKE.  
1038 **(F)** The top K *Diseases* where selected from the set of *Diseases* in the gold standard  
1039 network or **(F insert)** the entire set of *Disease* in SPOKE.

1040

1041 **Supplementary Figure 3. Recovering deleted *Compound-Gene* edges.** Prior to  
1042  $PSEV^{\Delta CC, \Delta CG}$  calculation all of the *Compound -Gene* and *Compound - Compound* edges  
1043 were deleted from SPOKE. It is possible to retrace how PSEV can recover deleted edges  
1044 (outlined in Figure 4C). **(A)** Shortest paths between the top SEPs of Tolmetin, a non-  
1045 steroidal anti-inflammatory drug, to its target *PTGSI*. **(B)** The gold standard *Compound-*

1046 *Gene* network was made from the deleted edges in SPOKE (*Compound-BINDS\_CbG-*  
1047 *Gene*). Plots show the number of *Compound-Gene* relationships using each of the PSEV  
1048 that overlap with the gold standard networks. The pink distributions show the results  
1049 from the permuted PSEV matrices ( $PSEV^{Random}$ ; 1000 iterations) while the arrows show  
1050 the results from the original PSEV (blue),  $PSEV^{\Delta CC, \Delta CG}$  (green),  $PSEV^{SPOKE SHUFFLED}$   
1051 (red), and  $PSEV^{SEP SHUFFLED}$  (orange). **(B)** The top K *Genes* where selected from the set  
1052 of *Genes* in the gold standard network or **(B insert)** the entire set of *Gene* nodes in  
1053 SPOKE. **(C-E)** Determining K threshold for recovering *Compound-Gene* edges. **(C)** The  
1054 top factor in determining missing *Compound-Gene* edges is whether patients that are on a  
1055 given compound are also diagnosed with a Disease that is a associated with the target  
1056 gene. **(D)** Shows the number of recovered *Compound-Gene* relationships at each rank  
1057 (where 1=top ranked and 1451 is the worst ranked *Gene*). **(E)** Shows how much the  
1058 patients that are prescribed a given *Compound* are contributing to the rank of the binding  
1059 partner (missing *Compound-Gene* relationship) of that *Compound* using the flow of  
1060 information through Diseases as in A. Genes ranked greater than ~150 are no longer  
1061 receiving positive patient contribution.

1062

1063 **Supplementary Figure 4. Recovering deleted *Compound-Compound* edges.** **(A)**  
1064 Retracing shortest between similar *Compounds*. The paths between Tioconazole to  
1065 Sertaconazole and Trihexyphenidyl to Procyclidine show two different routes in finding  
1066 similar compounds. **(B)** The gold standard *Compound-Compound* network was made  
1067 from the deleted edges in SPOKE (*Compound-RESEMBLES\_CrC-Compound*). **(B)** The  
1068 top K *Compound* where selected from the set of *Compound* in the gold standard network  
1069 or **(B insert)** the entire set of *Compound* in SPOKE.

1070

1071 **Figure 5 MEDLINE Anatomy-SideEffect Relationships are Top Ranked Nodes in**  
1072 **PSEV.** Fraction **(A)**, count **(B)**, and fold change **(C)** of overlapping edges MEDLINE  
1073 *Anatomy-SideEffect* network and PSEV *Anatomy-SideEffect* network (blue) or  
1074 random PSEV *Anatomy-SideEffect* network (red) for different thresholds of PSEV  
1075 disease similarity. A-C Are shown in 5% similarity intervals of ranked nodes starting  
1076 with the most similar 5% left and all nodes (100%) right. The inserts in A-C focus on



1077 the top 0.14-1.6% of ranked nodes. D-F Examples shortest paths connecting the  
1078 nodes that contribute the most to the *SideEffect-Anatomy* similarity to the target  
1079 *SideEffect* and *Anatomy* nodes.

1080

1081

1082 **Supplementary Table 1. SPOKE nodes and edges.** (A) Source(s) and counts of each  
1083 node type in SPOKE. (B) Source(s) and counts of each edge label in SPOKE.

1084

1085

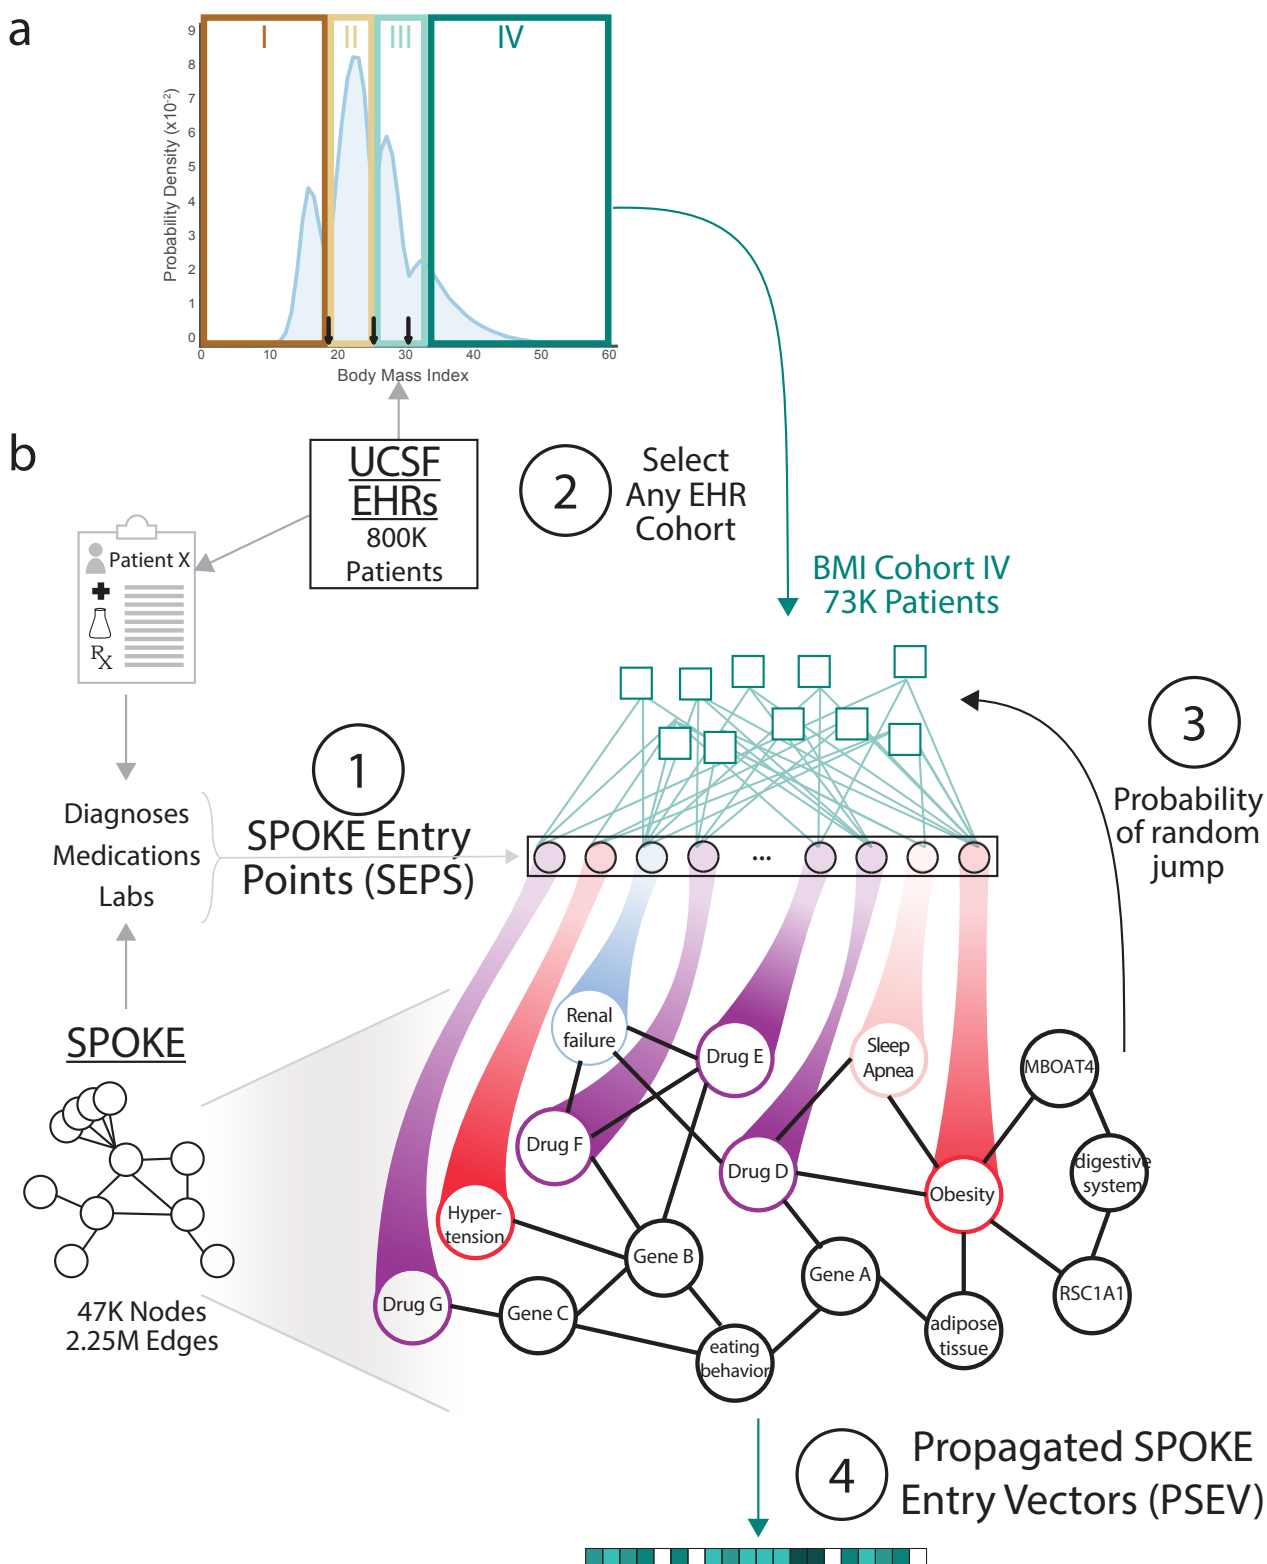

**Figure 1 Embedding EHR concepts in a knowledge network. (a)** Distribution of patient BMIs at UCSF. Four BMI cohorts were created using K-means clustering of BMI (boxes I-IV :  $\leq 19$ , 19.1-25.5, 25.6-34.2, and  $>34.2$ ). Arrows at the bottom correspond to the BMIs that separate the standardize weight classes. **(b)** Step 1: find the overlapping concepts between SPOKE and the patient data (EHRs). These are called SPOKE Entry Points (SEPs). Step 2: choose any code or concept in the EHR to make cohort. Here we have chosen patients with a high BMI (Cohort IV). Then connect each patient in the cohort to all of the SEPs in their records. Step 3: perform PageRank such that the walker restarts in the patient cohort. Iterate until desired threshold is reached. Step 4: final node ranks are then used to create the weights in the Propagated SPOKE Entry Vector (PSEV).

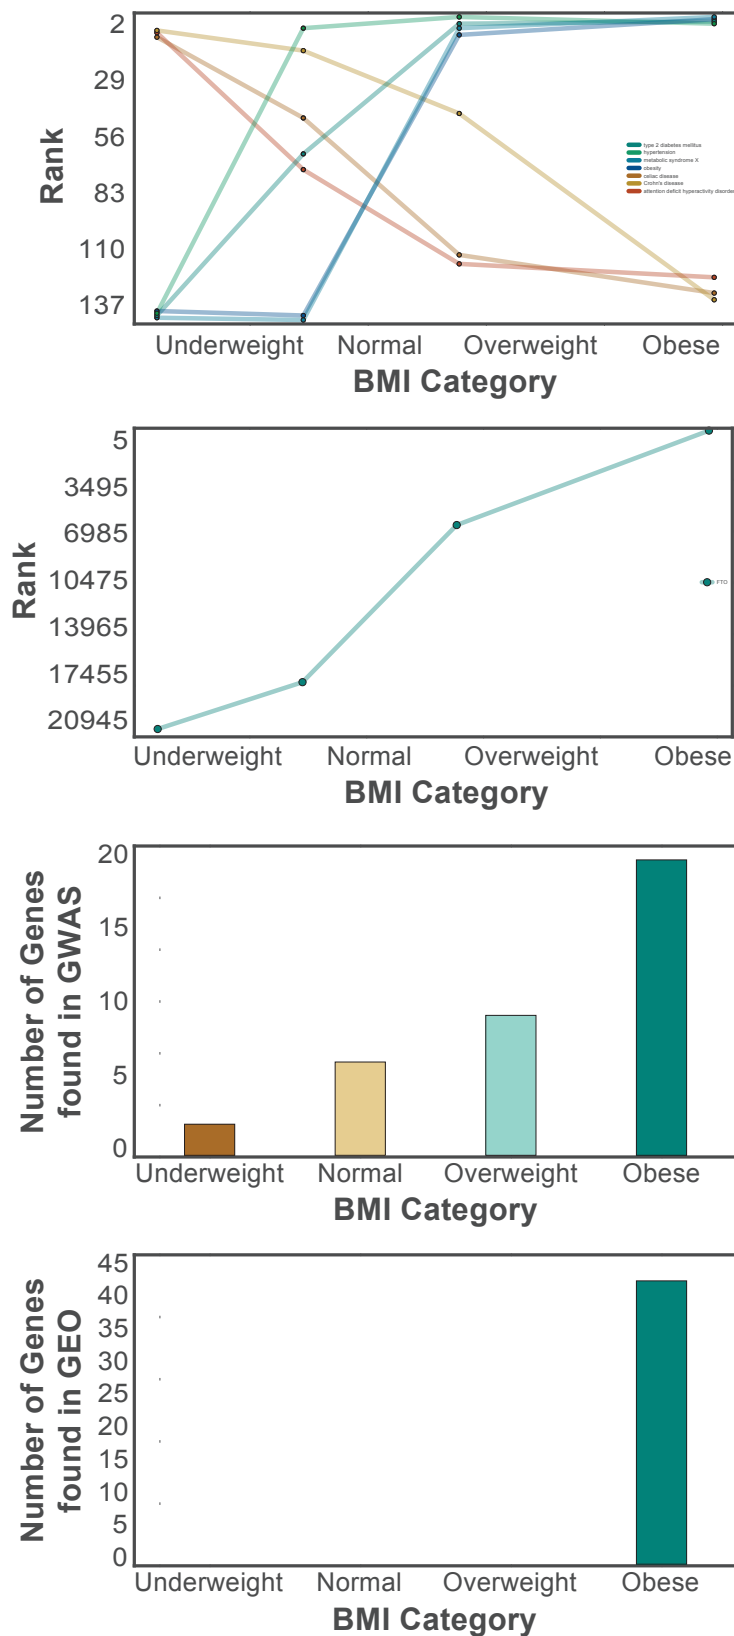

**Figure 2 PSEVs contain phenotypic and genotypic information. (a)** BMI Cohort vs Disease Rank. The top 4 ranked Diseases in the in Cohort IV's PSEV are obesity, hypertension, type 2 diabetes mellitus, and metabolic syndrome X. All 4 show a positive relationship with BMI. The opposite trend is observed for celiac disease, Crohn's disease, and attention deficit disorder which are highly ranked in Cohort I's PSEV. **(b)** FTO gene is positively correlated with BMI. **(c)** The number of overlapping genes between the GWAS catalog for increased BMI and the top 2.5% of Genes in each BMI cohort PSEV. **(d)** The number of overlapping genes between BMI related GEO datasets and the top 2.5% of Genes in each BMI cohort PSEV.

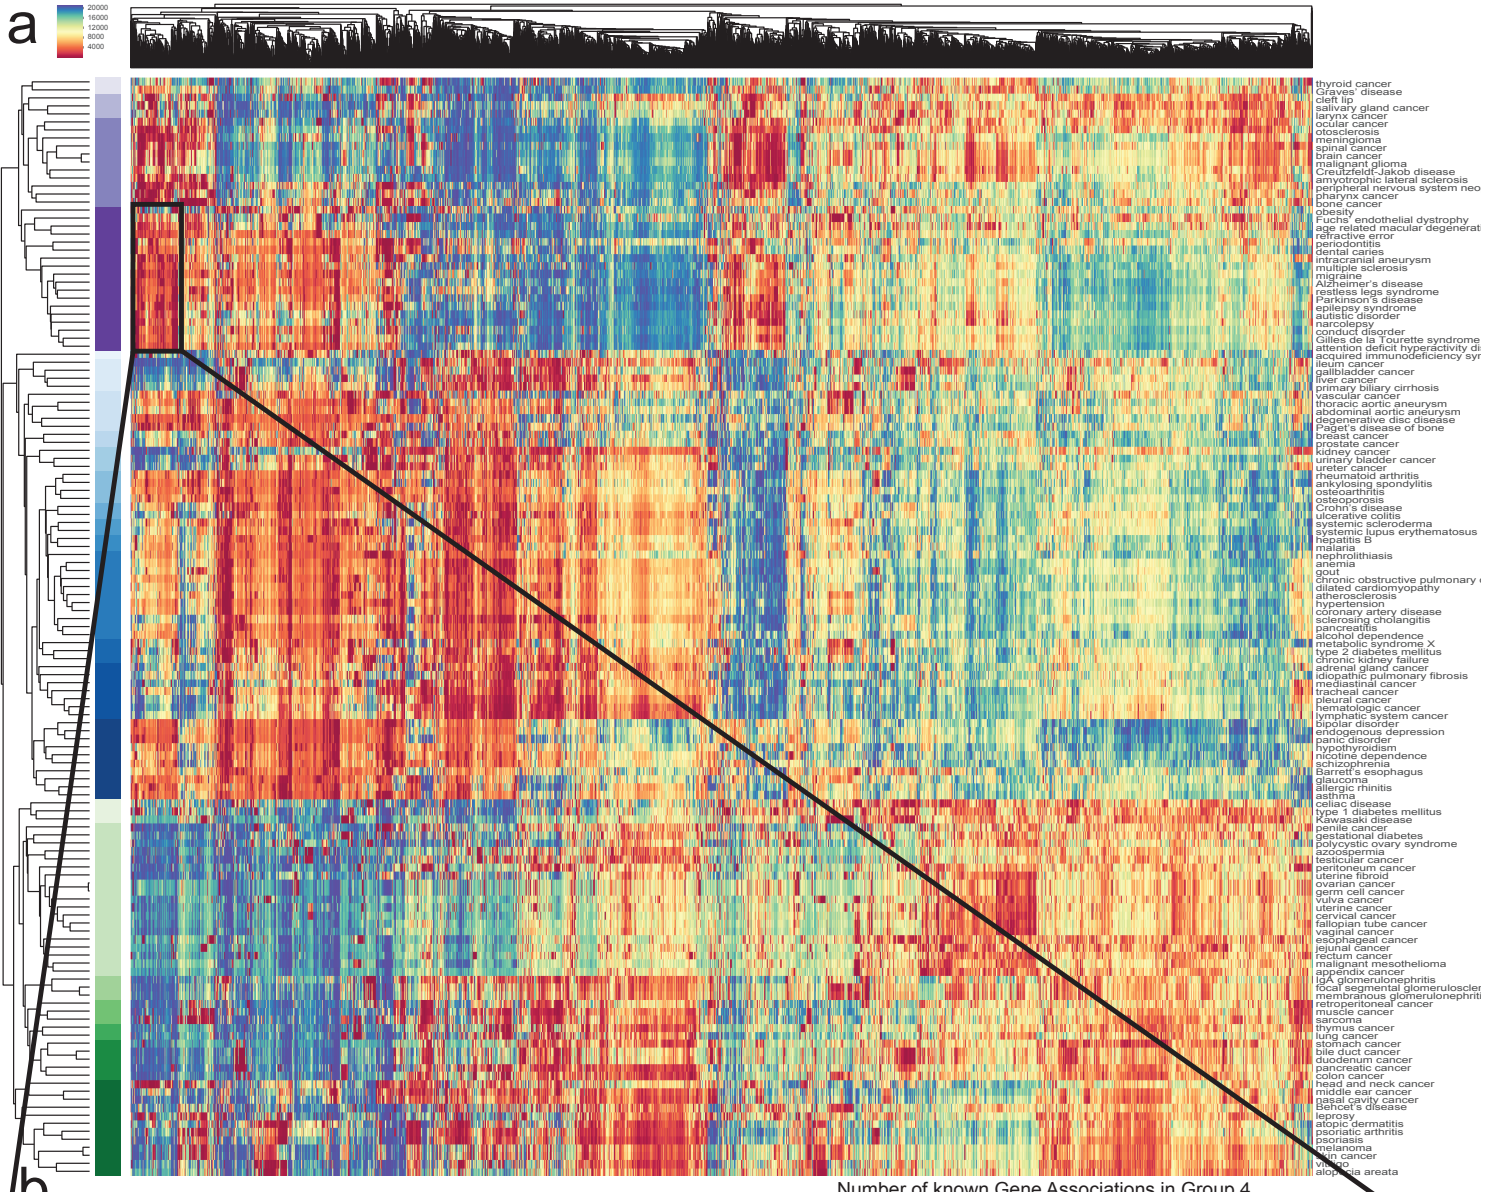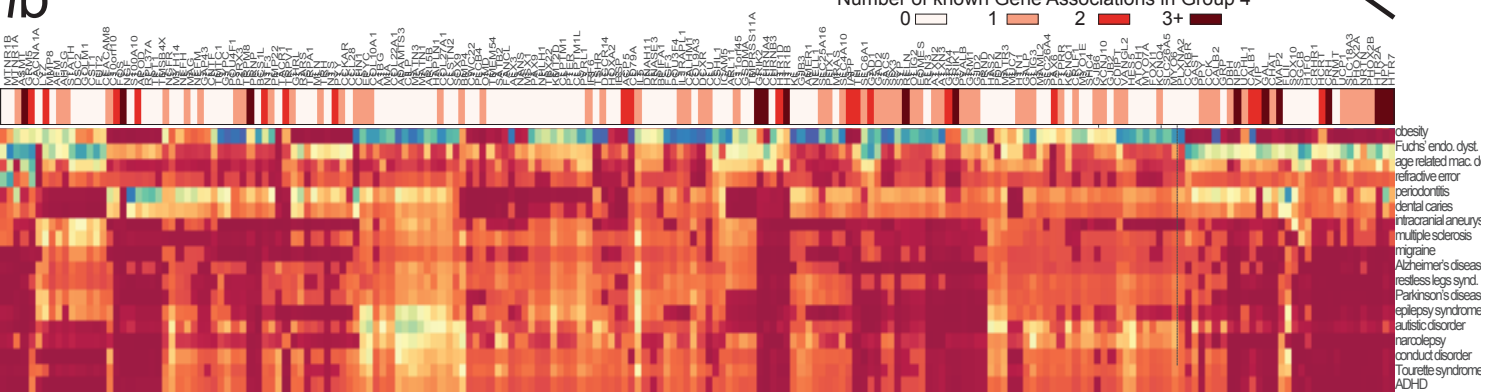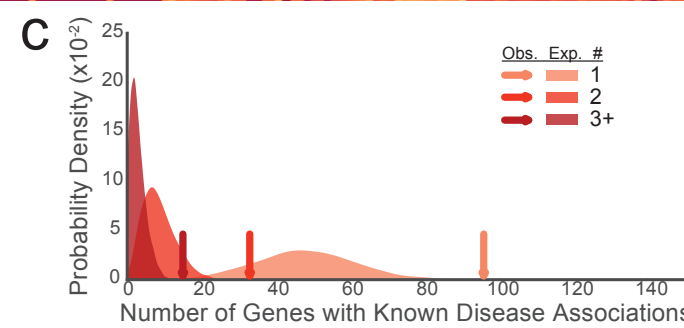

**d** Genes with 3+ Disease associations

| Gene Symbol | Description                                                           |
|-------------|-----------------------------------------------------------------------|
| CHRNA4      | cholinergic receptor, nicotinic, alpha 4 (neuronal)                   |
| CRH         | corticotropin releasing hormone                                       |
| GAL         | galanin/GMAP prepropeptide                                            |
| GRIK1       | glutamate receptor, ionotropic, kainate 1                             |
| GRIK2       | glutamate receptor, ionotropic, kainate 2                             |
| GRM5        | glutamate receptor, metabotropic 5                                    |
| HTR1B       | 5-hydroxytryptamine (serotonin) receptor 1B, G protein-coupled        |
| HTR2A       | 5-hydroxytryptamine (serotonin) receptor 2A, G protein-coupled        |
| HTR7        | 5-hydroxytryptamine (serotonin) receptor 7, adenylate cyclase-coupled |
| MAP2        | microtubule-associated protein 2                                      |
| NGF         | nerve growth factor (beta polypeptide)                                |
| NPS         | neuropeptide S                                                        |
| NPY         | neuropeptide Y                                                        |
| PRNP        | prion protein                                                         |
| RELN        | reelin                                                                |

**Figure 3. Disease Cluster by Genetic Similarity. (A)** Heat map generated with the *Disease* PSEV<sup>ADD, ΔDG</sup> (only using elements of *Genes* that associate with at least one *Disease*). Both *Disease* (rows) and *Genes* (columns) are clustered. Disease Cluster 4 (n=18) is enriched in neurological diseases and shown in dark purple. **(B)** Magnification of the 197 *Genes* found in a top *Gene* Cluster (Cluster 6) for Disease Cluster 4. Asterisks above *Gene* symbols indicate how many *Disease* in Disease Cluster 4 are associated with that *Gene*. Color bar signifies how many *Diseases* were associated with a given *Gene*. **(C)** Expected distributions for the number of *Genes* that are associated with at least one, two, or three *Diseases* (1000 random permutations of 18 *Disease* and 197 *Genes*). Arrows show the observed number over *Genes* within Gene Cluster 6 that are associated with at least one, two, or three *Disease* in Disease Cluster 4 and greatly exceed the expected number of *Genes* (fold change=2.0, 3.9, and 5.4 accordingly). **(D)** 15 *Genes* that are within Gene Cluster 6 are associated with three or more *Disease* in Disease Cluster 4.

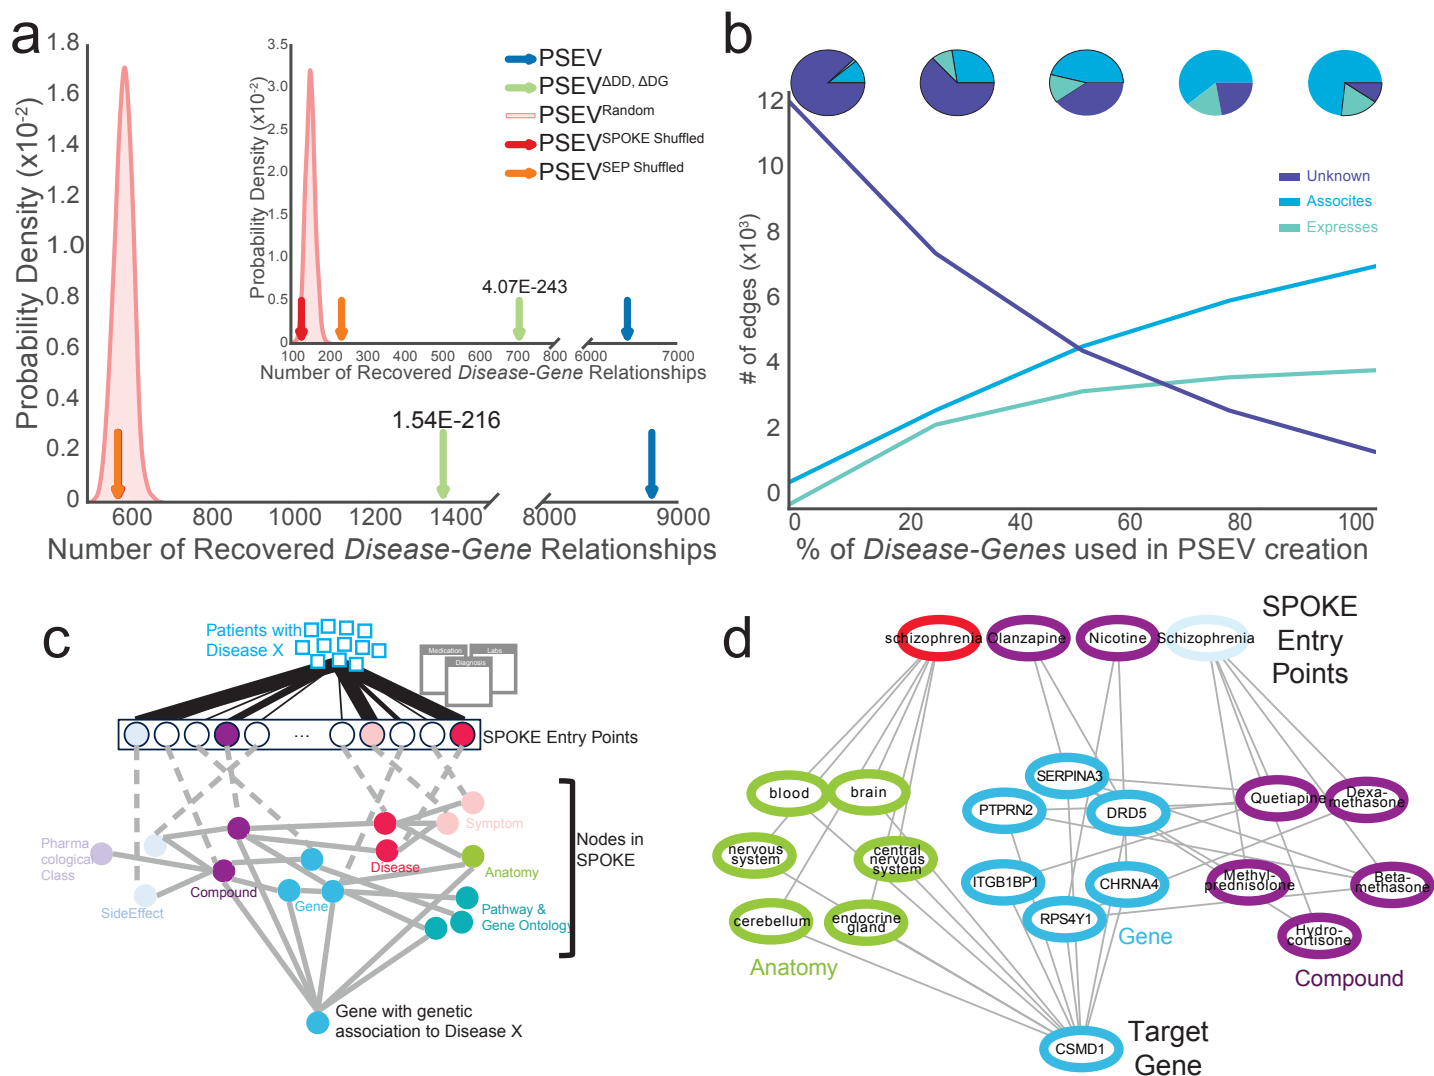

**Figure 4. Recovering deleted *Disease-Gene* edges. Prior to PSEV<sup>ADD, ΔDG</sup> calculation all of the *Disease-Gene* and *Disease-Disease* edges were deleted from SPOKE. (A) The gold standard *Disease-Gene* network was made from the deleted edges in SPOKE. Plots show the number of *Disease-Gene* relationships using each of the PSEV matrices that overlap with the gold standard networks. The pink distributions show the results from the permuted PSEV matrices (PSEV<sup>Random</sup>; 1000 iterations) while the arrows show the results from the original PSEV (blue), PSEV<sup>ADD, ΔDG</sup> (green), PSEV<sup>SPOKE SHUFFLED</sup> (red), and PSEV<sup>SEP SHUFFLED</sup> (orange). (A) The top K *Genes* were selected from the set of *Genes* in the gold standard network or (A insert) the entire set of *Gene* nodes in SPOKE. (B) The breakdown of top *Disease-Gene* relationships as knowledge (edges) is added back to the network. (C) To uncover how the deleted *Disease-Gene* associations are recovered using the PSEVs we retraced the shortest path between the most important SPOKE Entry points (SEPs) and the desired *Gene*. Patients with *Disease X* put pressure on the SEPs (top). The SEPs that receive the most significant amount of pressure are colored by node type. Information then flows through other nodes in SPOKE (middle) before reaching the *Gene* that is genetically associated to *Disease X* (bottom). (D) In the GWAS catalog Schizophrenia and CSMD1 are associated. As outlined in B, the information flows from the significant SEPs of patients with Schizophrenia to CSMD1.**

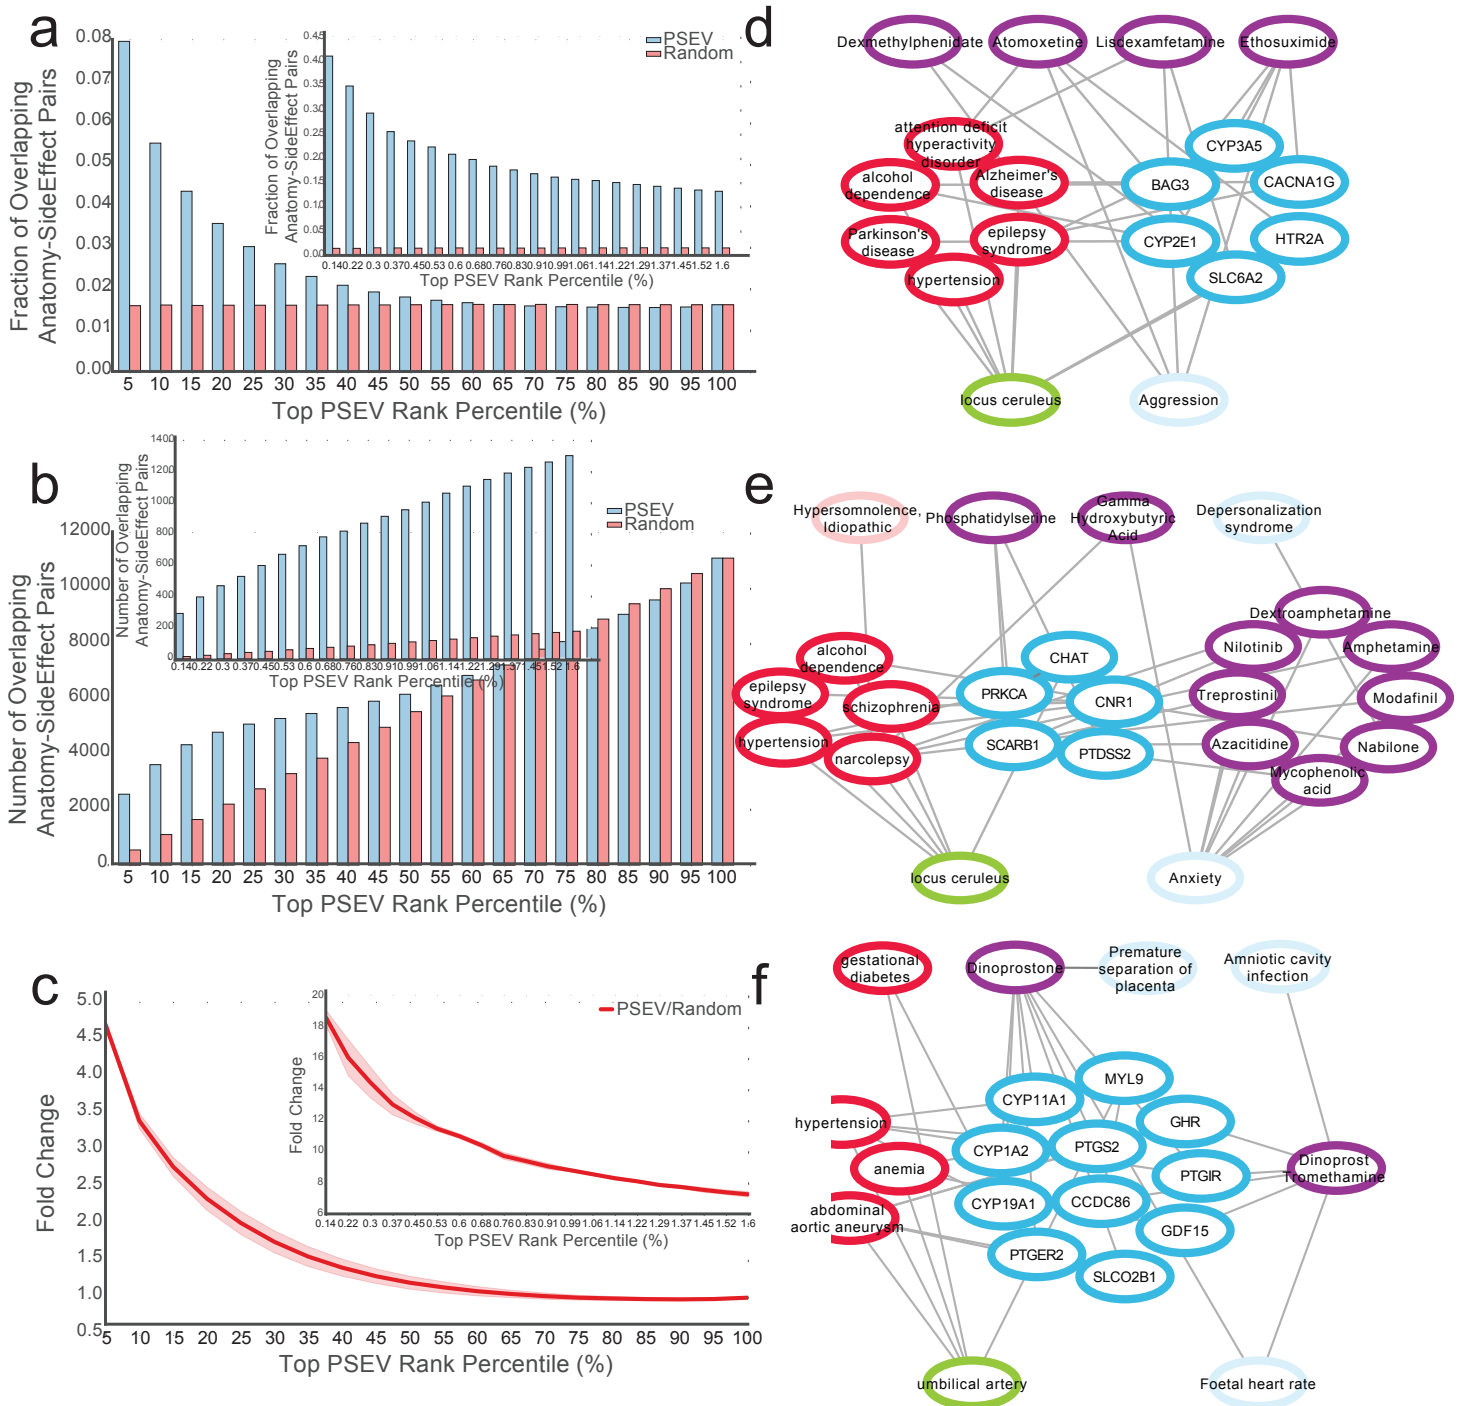

**Figure 5 MEDLINE Anatomy-SideEffect Relationships are Top Ranked Nodes in PSEV.** Fraction (A), count (B), and fold change (C) of overlapping edges MEDLINE Anatomy-SideEffect network and PSEV Anatomy-SideEffect network (blue) or random PSEV Anatomy-SideEffect network (red) for different thresholds of PSEV disease similarity. A-C are shown in 5% similarity intervals of ranked nodes starting with the most similar 5% left and all nodes (100%) right. The inserts in A-C focus on the top 0.14-1.6% of ranked nodes. D-F Examples shortest paths connecting the nodes that contribute the most to the Anatomy-SideEffect similarity to the target SideEffect and Anatomy nodes.
